# Supplementary material for: More Than Words: An Integrative Review of Innovative Elicitation Techniques for Qualitative Interviews
Source: bioRxiv or medRxiv preprint supplement (doi:10.1101/2024.05.29.24308062), 2024-05-29

# More Than Words: An Integrative Review of Innovative Elicitation Techniques for Qualitative Interviews

## Appendix B

### Screening Process using Covidence

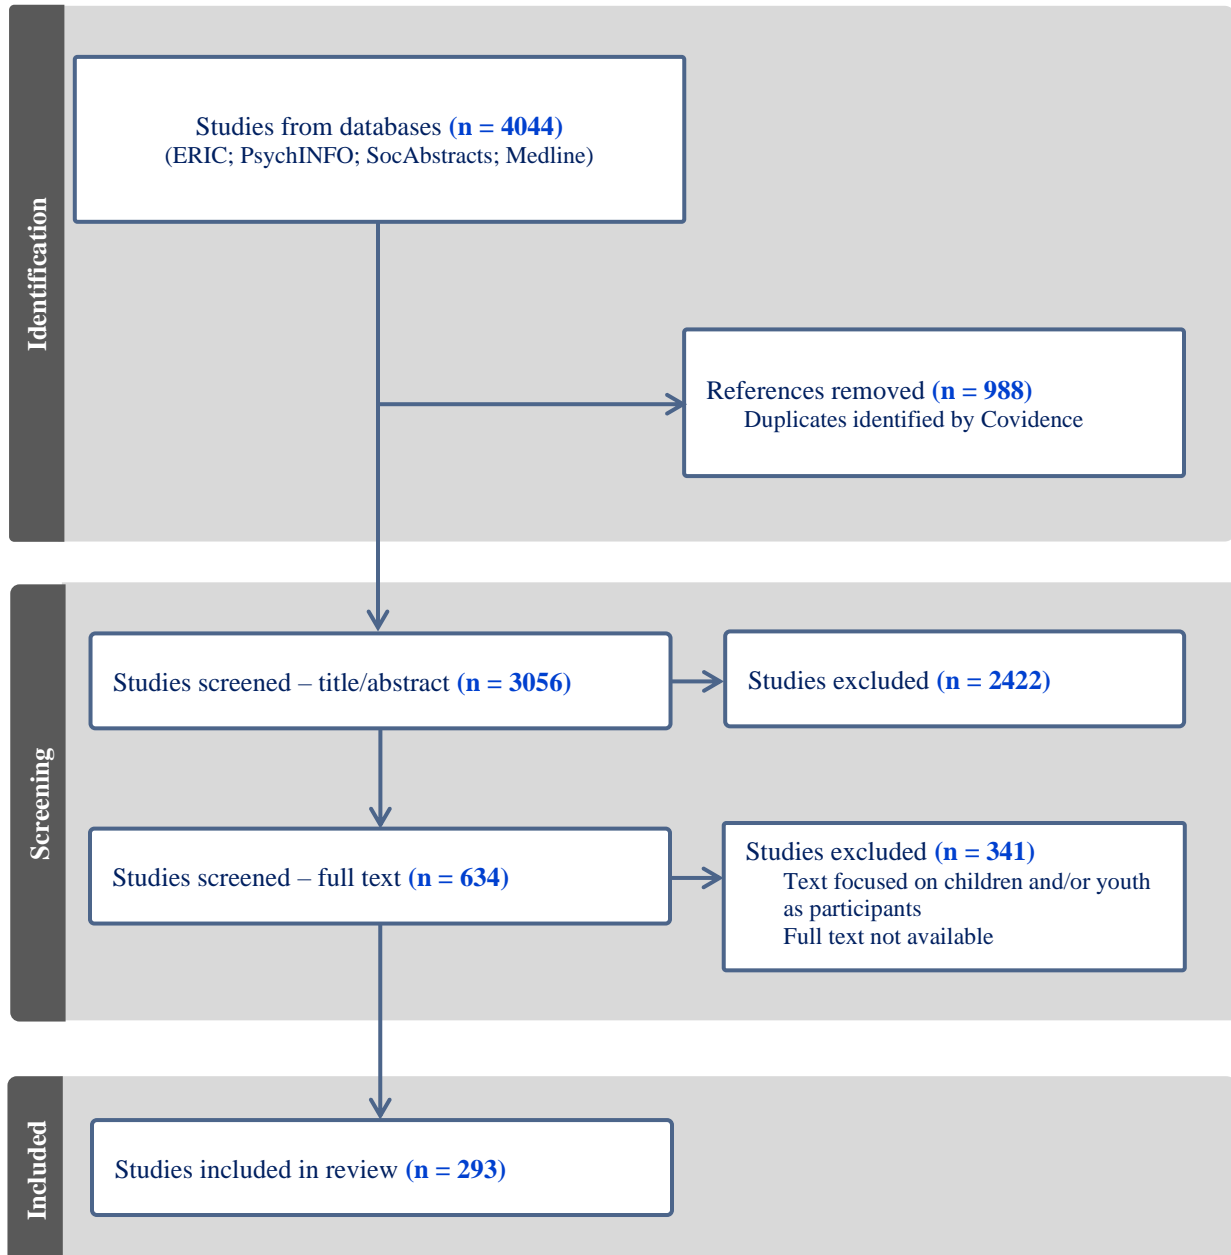

Supplement: Supplementary file [file media-2.pdf]
