# Supplementary material for: More Than Words: An Integrative Review of Innovative Elicitation Techniques for Qualitative Interviews
Source: bioRxiv or medRxiv preprint supplement (doi:10.1101/2024.05.29.24308062), 2024-05-29
Supplement: Supplementary file [file media-3.pdf]

## More Than Words: An Integrative Review of Innovative Elicitation Techniques for Qualitative Interviews

### Appendix C: Elicitation Techniques - Categorized and Sorted by Author

| Authors                                                                                                           | Title                                                                                                                                                       | Published Year | Journal                                                                                               | Volume | Issue | Pages        | DOI                                                                                                           | Technique(s)               |
|-------------------------------------------------------------------------------------------------------------------|-------------------------------------------------------------------------------------------------------------------------------------------------------------|----------------|-------------------------------------------------------------------------------------------------------|--------|-------|--------------|---------------------------------------------------------------------------------------------------------------|----------------------------|
| Affleck, William; Glass, K. C; MacDonald, Mary Ellen                                                              | The limitations of language: Male participants, stoicism, and the qualitative research interview.                                                           | 2013           | American Journal of Men's Health                                                                      |        | 7     | 2 155-162    | <a href="http://dx.doi.org/10.1177/1557988312464038">http://dx.doi.org/10.1177/1557988312464038</a>           | photo-elicitation          |
| Aldridge, Jo                                                                                                      | Working with vulnerable groups in social research: dilemmas by default and design                                                                           | 2014           | Qualitative Research                                                                                  |        | 14    | 1 112-130    | <a href="http://dx.doi.org/10.1177/1468794112455041">http://dx.doi.org/10.1177/1468794112455041</a>           | photo-elicitation          |
| Allen, Quaylan                                                                                                    | Photographs and stories: ethics, benefits and dilemmas of using participant photography with Black middle-class male youth                                  | 2012           | Qualitative Research Photography in educational research: Critical reflections from diverse contexts. |        | 12    | 4 443-458    | <a href="http://dx.doi.org/10.1177/1468794111433088">http://dx.doi.org/10.1177/1468794111433088</a>           | photo-elicitation          |
| Anderson, Terilynn                                                                                                | Photovoice as a catalyst for conversation: Children as co-researchers in an elementary school in the USA.                                                   | 2015           | Social research methods in dementia studies: Inclusion and innovation.                                |        |       | 36-49        |                                                                                                               | photo-elicitation          |
| Antelius, Eleonor; Kiwi, Mahin; Strandroos, Lisa                                                                  | Ethnographic methods for understanding practices around dementia among culturally and linguistically diverse people.                                        | 2018           | Handbook of research methods on trust.                                                                |        |       | 121-139      |                                                                                                               | reflection                 |
| Ashleigh, Melanie J; Meyer, Edgar                                                                                 | Deepening the understanding of trust: Combining repertory grid and narrative to explore the uniqueness of trust.                                            | 2012           | International Journal of Qualitative Methods                                                          |        |       | 138-148      |                                                                                                               | repertory grid             |
| Ayala, Ricardo A; Koch, Tomas F                                                                                   | The Image of Ethnographyâ€”Making Sense of the Social Through Images: A Structured Method                                                                   | 2019           | Design and Technology                                                                                 | 18     |       |              | <a href="http://dx.doi.org/10.1177/1609406919843014">http://dx.doi.org/10.1177/1609406919843014</a>           | drawing                    |
| Babapour, Maral; Rehammar, Bjorn; Rahe, Ulrike                                                                    | A Comparison of Diary Method Variations for Enlightening Form Generation in the Design Process                                                              | 2012           | Education                                                                                             | 17     |       | 3 49-60      |                                                                                                               | diary                      |
| Baker, Amanda A; Lee, Joseph J                                                                                    | Mind the Gap: Unexpected Pitfalls in Doing Classroom Research                                                                                               | 2011           | The Qualitative Report                                                                                | 16     |       | 5 1435-1447  |                                                                                                               | stimulated recall          |
| Balbale, Salva Najib; Schwingel, Andiarã; Chodzko-Zajko, Wojtek; Huhman, Marian                                   | Visual and participatory research methods for the development of health messages for underserved populations.                                               | 2014           | Health Communication                                                                                  |        | 29    | 7 728-740    | <a href="http://dx.doi.org/10.1080/10410236.2013.800442">http://dx.doi.org/10.1080/10410236.2013.800442</a>   | photo-elicitation          |
| Balmer, Claire; Griffiths, Frances; Dunn, Janet                                                                   | A 'new normal': Exploring the disruption of a poor prognostic cancer diagnosis using interviews and participant-produced photographs                        | 2015           | Health                                                                                                |        | 19    | 5 451-472    | <a href="http://dx.doi.org/10.1177/1363459314554319">http://dx.doi.org/10.1177/1363459314554319</a>           | photo-elicitation          |
| Balmer, Claire; Griffiths, Frances; Dunn, Janet                                                                   | A review of the issues and challenges involved in using participant-produced photographs in nursing research.                                               | 2015           | Journal of Advanced Nursing Journal of Mixed Methods                                                  |        | 71    | 7 1726-1737  | <a href="http://dx.doi.org/10.1111/jan.12627">http://dx.doi.org/10.1111/jan.12627</a>                         | photo-elicitation          |
| Balomenou, Nika; Garrod, Brian                                                                                    | A Review of Participant-Generated Image Methods in the Social Sciences                                                                                      | 2016           | Research Qualitative Research in Psychology                                                           | 10     |       | 4 335-351    | <a href="http://dx.doi.org/10.1177/1558689815581561">http://dx.doi.org/10.1177/1558689815581561</a>           | photo-elicitation          |
| Barbeiro, Ana; Spini, Dario                                                                                       | Calendar interviewing: A mixed methods device for a biographical approach to migration.                                                                     | 2017           | Psychology                                                                                            |        | 14    | 1 81-107     | <a href="http://dx.doi.org/10.1080/14780887.2016.1249581">http://dx.doi.org/10.1080/14780887.2016.1249581</a> | life grid                  |
| Barrantes-Elizondo, Lena                                                                                          | Creating Space for Visual Ethnography in Educational Research                                                                                               | 2019           | Online Submission                                                                                     |        | 23    | 2            |                                                                                                               | photo-elicitation; drawing |
| Bartlett, Ruth                                                                                                    | Modifying the diary interview method to research the lives of people with dementia                                                                          | 2012           | Qualitative Health Research Theory and Research in                                                    |        | 22    | 12 1717-1726 | <a href="http://dx.doi.org/10.1177/1049732312462240">http://dx.doi.org/10.1177/1049732312462240</a>           | diary                      |
| Barton, Keith C.                                                                                                  | Elicitation Techniques: Getting People to Talk about Ideas They Don't Usually Talk About                                                                    | 2015           | Social Education                                                                                      |        | 43    | 2 179-205    | <a href="http://dx.doi.org/10.1080/00933104.2015.1034392">http://dx.doi.org/10.1080/00933104.2015.1034392</a> | Review across categories   |
| Bates, Elizabeth A; McCann, Joseph J; Kaye, Linda K; Taylor, Julie C                                              | "Beyond words": A researcher's guide to using photo elicitation in psychology.                                                                              | 2017           | Qualitative Research in Psychology                                                                    |        | 14    | 4 459-481    | <a href="http://dx.doi.org/10.1080/14780887.2017.1359352">http://dx.doi.org/10.1080/14780887.2017.1359352</a> | photo-elicitation          |
| Beaudin, Bennett; Maar, Marion; Manitowabi Darrel; Moeke-Pickering Taimã; Trudeau-Peltier Doreen; Trudeau, Sheila | The Gaataaã™Maabing Visual Research Method: A Culturally Safe Anishinaabek Transformation of Photovoice                                                     | 2019           | International Journal of Qualitative Methods                                                          |        | 18    |              | <a href="http://dx.doi.org/10.1177/1609406919851635">http://dx.doi.org/10.1177/1609406919851635</a>           | photo-elicitation          |
| Becker, Larissa                                                                                                   | Methodological proposals for the study of consumer experience                                                                                               | 2018           | Qualitative Market Research: An International Journal                                                 |        | 21    | 4 465-490    | <a href="http://dx.doi.org/10.1108/QMR-01-2017-0036">http://dx.doi.org/10.1108/QMR-01-2017-0036</a>           | diary                      |
| Bendell, Katherine; Sylvestre, John                                                                               | How different approaches to taking pictures influences participation in a photovoice project                                                                | 2017           | Action Research                                                                                       |        | 15    | 4 357-372    | <a href="http://dx.doi.org/10.1177/1476750316653812">http://dx.doi.org/10.1177/1476750316653812</a>           | photo-elicitation          |
| Bendixen, Lisa D.; Klimow, Nicole                                                                                 | Participatory Concept Mapping as an Integration Tool in Mixed Methods Research: Exploring Preservice Teachers' Epistemic Cognition and Teaching Orientation | 2019           | International Journal of Educational Methodology                                                      |        | 5     | 2 247-264    |                                                                                                               | concept mapping            |
| Benedetti, Allison; Jackson, John; Luo, Lili                                                                      | Vignettes: Implications for LIS Research                                                                                                                    | 2018           | College & Research Libraries                                                                          |        | 79    | 2 222-236    |                                                                                                               | vignette                   |
| Berends, Lynda                                                                                                    | Embracing the Visual: Using Timelines with In-Depth Interviews on Substance Use and Treatment                                                               | 2011           | Qualitative Report                                                                                    |        | 16    | 1            |                                                                                                               | timeline                   |
| Berg, Tessa; Bowen, Tracey; Smith, Colin; Smith, Sally                                                            | Visualising the Future: Surfacing Student Perspectives on Post-Graduation Prospects Using Rich Pictures                                                     | 2017           | Higher Education Research and Development                                                             |        | 36    | 7 1339-1354  | <a href="http://dx.doi.org/10.1080/07294360.2017.1325855">http://dx.doi.org/10.1080/07294360.2017.1325855</a> | rich picture               |

|                                                                                                           |                                                                                                                                                                                                                                                                                  |      |                                                                                                      |    |              |                                                                                                                     |                                    |
|-----------------------------------------------------------------------------------------------------------|----------------------------------------------------------------------------------------------------------------------------------------------------------------------------------------------------------------------------------------------------------------------------------|------|------------------------------------------------------------------------------------------------------|----|--------------|---------------------------------------------------------------------------------------------------------------------|------------------------------------|
| Bessette, Harriet J.; Paris, Nita A.                                                                      | Using Visual and Textual Metaphors to Explore Teachers' Professional Roles and Identities                                                                                                                                                                                        | 2020 | International Journal of Research & Method in Education                                              | 43 | 2 173-188    | <a href="https://doi.org/10.1080/1743727X.2019.1611759">https://doi.org/10.1080/1743727X.2019.1611759</a>           | drawing                            |
| Birkeland, Asta                                                                                           | Research Dilemmas Associated with Photo Elicitation in Comparative Early Childhood Education Research                                                                                                                                                                            | 2013 | International Education Research in Comparative and International Education                          | 8  | 4 455-467    | <a href="http://dx.doi.org/10.2304/rcie.2013.8.4.455">http://dx.doi.org/10.2304/rcie.2013.8.4.455</a>               | photo-elicitation                  |
| Blikstad-Balas, Marte                                                                                     | Key Challenges of Using Video When Investigating Social Practices in Education: Contextualization, Magnification, and Representation                                                                                                                                             | 2017 | International Journal of Research & Method in Education                                              | 40 | 5 511-523    | <a href="https://doi.org/10.1080/1743727X.2016.1181162">https://doi.org/10.1080/1743727X.2016.1181162</a>           | video-elicitation                  |
| Bloch, Stefano                                                                                            | Place-based elicitation: Interviewing graffiti writers at the scene of the crime.                                                                                                                                                                                                | 2018 | Journal of Contemporary Ethnography                                                                  | 47 | 2 171-198    | <a href="http://dx.doi.org/10.1177/0891241616639640">http://dx.doi.org/10.1177/0891241616639640</a>                 | place-elicitation                  |
| Boden, Zoe; Larkin, Michael; Iyer, Malvika                                                                | Picturing ourselves in the world: Drawings, interpretative phenomenological analysis and the relational mapping interview.                                                                                                                                                       | 2019 | Qualitative Research in Psychology                                                                   | 16 | 2 218-236    | <a href="http://dx.doi.org/10.1080/14780887.2018.1540679">http://dx.doi.org/10.1080/14780887.2018.1540679</a>       | mapping                            |
| Bonnycastle, Marleny M.; Bonnycastle, Colin R.                                                            | Photographs Generate Knowledge: Reflections on Experiential Learning In/Outside the Social Work Classroom                                                                                                                                                                        | 2015 | Journal of Teaching in Social Work                                                                   | 35 | 3 233-250    | <a href="http://dx.doi.org/10.1080/08841233.2015.1027031">http://dx.doi.org/10.1080/08841233.2015.1027031</a>       | photo-elicitation                  |
| Bowes-Catton, Helen; Barker, Meg; Richards, Christina                                                     | I didn't know that I could feel this relaxed in my body': Using visual methods to research bisexual people's embodied experiences of identity and space. Towards a Critical Health Equity Research Stance: Why Epistemology and Methodology Matter More than Qualitative Methods | 2011 | Visual methods in psychology: Using and interpreting images in qualitative research.                 |    | 255-270      |                                                                                                                     | photo-elicitation; diary           |
| Bowleg, Lisa                                                                                              | Research Ethics Committees and the Benefits of Involving People with Profound and Multiple Learning Disabilities in Research                                                                                                                                                     | 2017 | Health Education & Behavior                                                                          | 44 | 5 677-684    | <a href="http://dx.doi.org/10.1177/1090198117728760">http://dx.doi.org/10.1177/1090198117728760</a>                 | photo-elicitation                  |
| Boxall, Kathy; Ralph, Sue                                                                                 |                                                                                                                                                                                                                                                                                  | 2011 | British Journal of Learning Disabilities                                                             | 39 | 3 173-180    | <a href="http://dx.doi.org/10.1111/j.1468-3156.2010.00645.x">http://dx.doi.org/10.1111/j.1468-3156.2010.00645.x</a> | photo-elicitation                  |
| Bradbury-Jones, C; Taylor, J; Herber, OR                                                                  | Vignette development and administration: a framework for protecting research participants                                                                                                                                                                                        | 2014 | International Journal of Social Research Methodology                                                 | 17 | 4 427-440    | <a href="http://dx.doi.org/10.1080/13645579.2012.750833">http://dx.doi.org/10.1080/13645579.2012.750833</a>         | vignette                           |
| Branch, Nicole A.                                                                                         | Illuminating Social Justice in the Framework: Transformative Methodology, Concept Mapping and Learning Outcomes Development for Critical Information Literacy                                                                                                                    | 2019 | Communications in Information Literacy                                                               | 13 | 1            |                                                                                                                     | concept mapping                    |
| Bravington Alison; King, Nigel                                                                            | Putting graphic elicitation into practice: tools and typologies for the use of participant-led diagrams in qualitative research interviews                                                                                                                                       | 2019 | Qualitative Research                                                                                 | 19 | 5 506-523    | <a href="http://dx.doi.org/10.1177/1468794118781718">http://dx.doi.org/10.1177/1468794118781718</a>                 | diagram                            |
| Breen, Andrea V; Scott, Christine; McLean, Kate C                                                         | The "stuff" of narrative identity: Touring big and small stories in emerging adults' dorm rooms.                                                                                                                                                                                 | 2019 | Qualitative Psychology                                                                               |    |              | <a href="http://dx.doi.org/10.1037/qp0000158">http://dx.doi.org/10.1037/qp0000158</a>                               | life grid                          |
| Brooks, Rachel; Lainio, Anu; Lazetić, Predrag                                                             | Using creative methods to research across difference. An introduction to the special issue, International Journal of Social Research Methodology, 23:1, 1-6, DOI: 10.1080/13645579.2019.1672281                                                                                  | 2020 | International journal of social research methodology                                                 | 23 | 1 1-6        | <a href="https://doi.org/10.1080/13645579.2019.1672281">https://doi.org/10.1080/13645579.2019.1672281</a>           | Review across categories           |
| Brown, Kyla; Worrall, Linda; Davidson, Bronwyn; Howe, Tami                                                | Reflection on the benefits and limitations of participant-generated photography as an adjunct to qualitative interviews with participants with aphasia.                                                                                                                          | 2013 | Aphasiology                                                                                          | 27 | 10 1214-1231 | <a href="http://dx.doi.org/10.1080/02687038.2013.808736">http://dx.doi.org/10.1080/02687038.2013.808736</a>         | photo-elicitation                  |
| Brown, Nicole                                                                                             | Identity boxes: using materials and metaphors to elicit experiences                                                                                                                                                                                                              | 2019 | International Journal of Social Research Methodology                                                 | 22 | 5 487-501    | <a href="http://dx.doi.org/10.1080/13645579.2019.1590894">http://dx.doi.org/10.1080/13645579.2019.1590894</a>       | object-elicitation                 |
| Brushwood Rose, Chloe; Granger, Colette A.                                                                | Unexpected Self-Expression and the Limits of Narrative Inquiry: Exploring Unconscious Dynamics in a Community-Based Digital Storytelling Workshop                                                                                                                                | 2013 | International Journal of Qualitative Studies in Education (QSE)                                      | 26 | 2 216-237    | <a href="https://doi.org/10.1080/09518398.2012.666286">https://doi.org/10.1080/09518398.2012.666286</a>             | story-telling                      |
| Bryanton Olive; Weeks, Lori; Townsend, Elizabeth; Montelpare, William; Lees, Jessie; Moffatt Lyndsay      | The Utilization and Adaption of Photovoice With Rural Women Aged 85 and Older                                                                                                                                                                                                    | 2019 | International Journal of Qualitative Methods                                                         | 18 |              | <a href="http://dx.doi.org/10.1177/1609406919883450">http://dx.doi.org/10.1177/1609406919883450</a>                 | photo-elicitation                  |
| Bugos, Eva; Frasso, Rosemary; FitzGerald, Elizabeth; True, Gala; Adachi-Mejia, Anna M; Cannuscio, Carolyn | Practical guidance and ethical considerations for studies using photo-elicitation interviews.                                                                                                                                                                                    | 2014 | Preventing Chronic Disease: Public Health Research, Practice, and Policy                             | 11 |              |                                                                                                                     | photo-elicitation                  |
| Burgess-Allen, Jilla; Owen-Smith, Vicci                                                                   | Using mind mapping techniques for rapid qualitative data analysis in public participation processes.                                                                                                                                                                             | 2010 | Health Expectations: An International Journal of Public Participation in Health Care & Health Policy | 13 | 4 406-415    | <a href="http://dx.doi.org/10.1111/j.1369-7625.2010.00594.x">http://dx.doi.org/10.1111/j.1369-7625.2010.00594.x</a> | concept mapping; mind mapping      |
| Burkart, Thomas; Weggen, Jenny                                                                            | Dialogic introspection: A method for exploring emotions in everyday life and experimental contexts.                                                                                                                                                                              | 2015 | Methods of exploring emotions.                                                                       |    | 101-111      |                                                                                                                     | reflection, dialogic introspection |
| Burke, Dawn; Evans, Joan                                                                                  | Embracing the Creative: The Role of Photo Novella in Qualitative Nursing Research                                                                                                                                                                                                | 2011 | International Journal of Qualitative Methods                                                         | 10 | 2 164-177    | <a href="http://dx.doi.org/10.1177/160940691101000205">http://dx.doi.org/10.1177/160940691101000205</a>             | photo-elicitation                  |
| Burles Meridith; Thomas, Roanne                                                                           | â€œJust Don't Think There's any other Image that Tells the Story like [This] Picture Doesâ€: Researcher and Participant Reflections on the Use of Participant-Employed Photography in Social Research                                                                            | 2014 | International Journal of Qualitative Methods                                                         | 13 | 1 185-205    | <a href="http://dx.doi.org/10.1177/160940691401300107">http://dx.doi.org/10.1177/160940691401300107</a>             | photo-elicitation                  |

|                                                                                     |                                                                                                                                                                          |                                                                                                                                                                         |      |    |             |                                                                                                               |                            |
|-------------------------------------------------------------------------------------|--------------------------------------------------------------------------------------------------------------------------------------------------------------------------|-------------------------------------------------------------------------------------------------------------------------------------------------------------------------|------|----|-------------|---------------------------------------------------------------------------------------------------------------|----------------------------|
| Burton, Amy; Hughes, Melanie; Dempsey, Robert C                                     | Quality of life research: A case for combining photo-elicitation with interpretative phenomenological analysis.                                                          | Qualitative Research in Psychology                                                                                                                                      | 2017 | 14 | 4 375-393   | <a href="http://dx.doi.org/10.1080/14780887.2017.1322650">http://dx.doi.org/10.1080/14780887.2017.1322650</a> | photo-elicitation          |
| Campbell, Sarah; Ward, Richard                                                      | Video and observation data as a method to document practice and performances of gender in the dementia care-based hair salon: Practices and processes.                   | Social research methods in dementia studies: Inclusion and innovation.                                                                                                  | 2018 |    | 96-117      |                                                                                                               | video-elicitation          |
| Capous-Desyllas Moshoula; Bromfield, Nicole F                                       | Using an Arts-Informed Eclectic Approach to Photovoice Data Analysis                                                                                                     | International Journal of Qualitative Methods                                                                                                                            | 2018 | 17 | 1           | <a href="http://dx.doi.org/10.1177/1609406917752189">http://dx.doi.org/10.1177/1609406917752189</a>           | photo-elicitation          |
| Carroll, Katherine; Mesman, Jessica                                                 | Multiple researcher roles in video-reflexive ethnography.                                                                                                                | Qualitative Health Research                                                                                                                                             | 2018 | 28 | 7 1145-1156 | <a href="http://dx.doi.org/10.1177/1049732318759490">http://dx.doi.org/10.1177/1049732318759490</a>           | video-elicitation          |
| Cassidy, Angela; Maule, John                                                        | Risk communication and participatory research: 'Fuzzy felt', visual games and group discussion of complex issues.                                                        | Visual methods in psychology: Using and interpreting images in qualitative research.                                                                                    | 2011 |    | 205-222     |                                                                                                               | fuzzy felt                 |
| Catalani, Caricia; Minkler, Meredith                                                | Photovoice: A Review of the Literature in Health and Public Health                                                                                                       | Health Education & Behavior                                                                                                                                             | 2010 | 37 | 3 424-451   | <a href="https://doi.org/10.1177/1090198109342084">https://doi.org/10.1177/1090198109342084</a>               | photo-elicitation;         |
| Catney, Gemma; Frost, Diane; Vaughn, Leona                                          | Residents' perspectives on defining neighbourhood: Mental mapping as a tool for participatory neighbourhood research.                                                    | Qualitative Research                                                                                                                                                    | 2019 | 19 | 6 735-752   | <a href="http://dx.doi.org/10.1177/1468794118803841">http://dx.doi.org/10.1177/1468794118803841</a>           | photovoice                 |
| Chang, Jamie Suki                                                                   | The Decent Method: A Grounded Theory Approach for Researching Place and Health.                                                                                          | Qualitative health research                                                                                                                                             | 2017 | 27 | 4 609-619   | <a href="https://dx.doi.org/10.1177/1049732316667055">https://dx.doi.org/10.1177/1049732316667055</a>         | mapping                    |
| Chawla-Duggan, Rita; Konantambigi, Rajani; Lam, Michelle Mei Seung; Sollied, Sissel | A visual methods approach for researching children's perspectives: capturing the dialectic and visual reflexivity in a cross-national study of father-child interactions | International Journal of Social Research Methodology                                                                                                                    | 2020 | 23 | 1 37-54     | <a href="http://dx.doi.org/10.1080/13645579.2019.1672283">http://dx.doi.org/10.1080/13645579.2019.1672283</a> | walking                    |
| Chawla-Duggan, Rita; Milner, Susan; Porter, Jill                                    | Reflexivity and visual technology in research: young children's perspectives of paternal engagement in the home environment                                              | Qualitative Research International Journal of Qualitative Methods                                                                                                       | 2018 | 18 | 4 471-491   | <a href="http://dx.doi.org/10.1177/1468794117728412">http://dx.doi.org/10.1177/1468794117728412</a>           | video-elicitation          |
| Chen, Annie T                                                                       | Timeline Drawing and the Online Scrapbook                                                                                                                                | Qualitative Methods                                                                                                                                                     | 2018 | 17 | 1           | <a href="http://dx.doi.org/10.1177/1609406917753207">http://dx.doi.org/10.1177/1609406917753207</a>           | video-elicitation          |
| Chen, Julienne; Neo Pearlyn                                                         | Texting the waters: An assessment of focus groups conducted via the WhatsApp smartphone messaging application                                                            | Methodological Innovations International Journal of Qualitative Methods                                                                                                 | 2019 | 12 | 3           | <a href="http://dx.doi.org/10.1177/2059799119884276">http://dx.doi.org/10.1177/2059799119884276</a>           | timeline; collage          |
| Ciolan Lucian; Manasia Loredana                                                     | Reframing Photovoice to Boost Its Potential for Learning Research                                                                                                        | Qualitative Methods                                                                                                                                                     | 2017 | 16 | 1           | <a href="http://dx.doi.org/10.1177/1609406917702909">http://dx.doi.org/10.1177/1609406917702909</a>           | card task                  |
| Clark, Alison                                                                       | Breaking Methodological Boundaries? Exploring Visual, Participatory Methods with Adults and Young Children                                                               | European Early Childhood Education Research Journal                                                                                                                     | 2011 | 19 | 3 321-330   | <a href="http://dx.doi.org/10.1080/1350293X.2011.597964">http://dx.doi.org/10.1080/1350293X.2011.597964</a>   | photo-elicitation;         |
| Clark, Andrew; Morriss, Lisa                                                        | The use of visual methodologies in social work research over the last decade: A narrative review and some questions for the future                                       | Qualitative Social Work British Journal of Learning Disabilities                                                                                                        | 2017 | 16 | 1 29-43     | <a href="http://dx.doi.org/10.1177/1473325015601205">http://dx.doi.org/10.1177/1473325015601205</a>           | mapping                    |
| Cluley, Victoria                                                                    | Using Photovoice to Include People with Profound and Multiple Learning Disabilities in Inclusive Research                                                                | Disabilities                                                                                                                                                            | 2017 | 45 | 1 39-46     | <a href="http://dx.doi.org/10.1111/bld.12174">http://dx.doi.org/10.1111/bld.12174</a>                         | mapping; photo-elicitation |
| Coemans Sara; Anne-Leen, Raymakers; Vandenabeele Joke; Hannes, Karin                | Evaluating the extent to which social researchers apply feminist and empowerment frameworks in photovoice studies with female participants: A literature review          | Qualitative Social Work Forum : Qualitative Social Research                                                                                                             | 2019 | 18 | 1 37-59     | <a href="http://dx.doi.org/10.1177/1473325017699263">http://dx.doi.org/10.1177/1473325017699263</a>           | photo-elicitation          |
| CohenMiller, Anna S                                                                 | Visual Arts as a Tool for Phenomenology                                                                                                                                  | Researching reflexively with patients and families: Two studies using video-reflexive ethnography to collaborate with patients and families in patient safety research. | 2018 | 19 | 1           |                                                                                                               | drawing                    |
| Collier, Aileen; Wyer, Mary                                                         | Researching reflexively with patients and families: Two studies using video-reflexive ethnography to collaborate with patients and families in patient safety research.  | Qualitative Health Research                                                                                                                                             | 2016 | 26 | 7 979-993   | <a href="http://dx.doi.org/10.1177/1049732315618937">http://dx.doi.org/10.1177/1049732315618937</a>           | video-elicitation          |
| Consuegra, Els; Engels, Nadine; Willekens, Vicky                                    | Using video-stimulated recall to investigate teacher awareness of explicit and implicit gendered thoughts on classroom interactions                                      | Teachers and Teaching: Theory and Practice                                                                                                                              | 2016 | 22 | 6 683-699   | <a href="http://dx.doi.org/10.1080/13540602.2016.1158958">http://dx.doi.org/10.1080/13540602.2016.1158958</a> | stimulated recall          |
| Cooper, Cheryl M; Yarbrough, Susan P                                                | Tell me-Show me: Using combined focus group and photovoice methods to gain understanding of health issues in rural Guatemala.                                            | Qualitative Health Research                                                                                                                                             | 2010 | 20 | 5 644-653   | <a href="http://dx.doi.org/10.1177/1049732310361894">http://dx.doi.org/10.1177/1049732310361894</a>           | photo-elicitation          |
| Cooper, Cheryl; Sorensen, William; Yarbrough, Susan                                 | Visualising the Health of Communities: Using Photovoice as a Pedagogical Tool in the College Classroom                                                                   | Health Education Journal International Journal of Qualitative Methods                                                                                                   | 2017 | 76 | 4 454-466   | <a href="http://dx.doi.org/10.1177/0017896917691790">http://dx.doi.org/10.1177/0017896917691790</a>           | photo-elicitation          |
| Copeland, Andrea J; Agosto, Denise E                                                | Diagrams and Relational Maps: The Use of Graphic Elicitation Techniques with Interviewing for Data Collection, Analysis, and Display                                     | Qualitative Methods                                                                                                                                                     | 2012 | 11 | 5 513-533   | <a href="http://dx.doi.org/10.1177/160940691201100501">http://dx.doi.org/10.1177/160940691201100501</a>       | photo-elicitation          |
| Copes, Heith; Tchoula, Whitney; Brookman, Fiona; Ragland, Jared                     | Photo-Elicitation Interviews with Vulnerable Populations: Practical and Ethical Considerations                                                                           | Deviant Behavior Information Research: An International Electronic Journal                                                                                              | 2018 | 39 | 4 475-494   | <a href="http://dx.doi.org/10.1080/01639625.2017.1407109">http://dx.doi.org/10.1080/01639625.2017.1407109</a> | mapping                    |
| Cox, Andrew; Benson, Melanie                                                        | Visual Methods and Quality in Information Behaviour Research: The Cases of Photovoice and Mental Mapping                                                                 | Journal                                                                                                                                                                 | 2017 | 22 | 2           |                                                                                                               | photo-elicitation          |
| Cudworth Erika                                                                      | Now, where were we?: The highs and lows of hunting data with a research pack                                                                                             | Journal of Sociology                                                                                                                                                    | 2018 | 54 | 4 488-503   | <a href="http://dx.doi.org/10.1177/1440783318816761">http://dx.doi.org/10.1177/1440783318816761</a>           | walking                    |
| D'angelo Alessio; Ryan, Louise; Tubaro Paola                                        | Visualization in Mixed-Methods Research on Social Networks                                                                                                               | Sociological Research Online Asia-Pacific Journal of Teacher Education                                                                                                  | 2016 | 21 | 2 1-4       | <a href="http://dx.doi.org/10.5153/sro.3996">http://dx.doi.org/10.5153/sro.3996</a>                           | photo-elicitation          |
| Daniel, Leah                                                                        | A methodology to investigate pre-service teachers' content-related instructional decisions and teaching actions                                                          | Teacher Education                                                                                                                                                       | 2018 | 46 | 5 478-494   | <a href="http://dx.doi.org/10.1080/1359866X.2018.1444139">http://dx.doi.org/10.1080/1359866X.2018.1444139</a> | photo-elicitation          |
|                                                                                     |                                                                                                                                                                          |                                                                                                                                                                         |      |    |             |                                                                                                               | stimulated recall          |

|                                                                                                                            |                                                                                                                                                                                       |                                                                                      |      |    |    |                                                                                                     |                                                                                                                                         |                                    |
|----------------------------------------------------------------------------------------------------------------------------|---------------------------------------------------------------------------------------------------------------------------------------------------------------------------------------|--------------------------------------------------------------------------------------|------|----|----|-----------------------------------------------------------------------------------------------------|-----------------------------------------------------------------------------------------------------------------------------------------|------------------------------------|
| Darnhofer Ika                                                                                                              | Using Comic-Style Posters for Engaging Participants and for Promoting Researcher Reflexivity                                                                                          | International Journal of Qualitative Methods                                         | 2018 | 17 | 1  | <a href="http://dx.doi.org/10.1177/1609406918804716">http://dx.doi.org/10.1177/1609406918804716</a> | comic                                                                                                                                   |                                    |
| Davies, Simon J; Bourke, Lorna J                                                                                           | Crossing over cultures: Using visual methods in a cross-cultural context for teaching and research.                                                                                   | Teaching visual methods in the social sciences.                                      | 2017 |    |    | 162-181                                                                                             | photo-elicitation; drawing                                                                                                              |                                    |
| Day, Melissa; Thatcher, Joanne de Groot, Tjitske; Jacquet, Wolfgang; Free De Backer; Peters, Ruth; Meurs, Pieter           | "I'm really embarrassed that you're going to read this ...": Reflections on using diaries in qualitative research.                                                                    | Qualitative Research in Psychology                                                   | 2009 | 6  | 4  | 249-259                                                                                             | <a href="http://dx.doi.org/10.1080/14780880802070583">http://dx.doi.org/10.1080/14780880802070583</a>                                   | diary                              |
| de Jager, AdÃle; Fogarty, Andrea; Tewson, Anna; Lenette, Caroline; Boydell, Katherine M                                  | Using visual vignettes to explore sensitive topics: a research note on exploring attitudes towards people with albinism in Tanzania                                                   | International Journal of Social Research Methodology                                 | 2020 | 23 | 6  | 749-755                                                                                             | <a href="http://dx.doi.org/10.1080/13645579.2020.1757250">http://dx.doi.org/10.1080/13645579.2020.1757250</a>                           | vignette; photo-elicitation        |
| de Souza Daniela Maysa; Backes VÃnia Marli Schubert; do Prado Marta Lenise; Martini Jussara Gue; Medina Moya JosÃ Luis | Digital Storytelling in Research: A Systematic Review                                                                                                                                 | The Qualitative Report                                                               | 2017 | 22 | 10 | 2548-2582                                                                                           |                                                                                                                                         | story-telling                      |
|                                                                                                                            | The Use of Autocopy From the Epistemological Perspective of Action Research for Self-Analysis and Reflection of Teacher Practice                                                      | International Journal of Qualitative Methods                                         | 2019 | 18 |    |                                                                                                     | <a href="http://dx.doi.org/10.1177/1609406919873247">http://dx.doi.org/10.1177/1609406919873247</a>                                     | video-elicitation                  |
| Del Busso, Lilliana                                                                                                        | Using photographs to explore the embodiment of pleasure in everyday life.                                                                                                             | Visual methods in psychology: Using and interpreting images in qualitative research. | 2011 |    |    | 43-54                                                                                               |                                                                                                                                         | vignette                           |
| Dew, Angela; Smith, Louisa; Collings, Susan; Isabella Dillon Savage                                                        | Complexity Embodied: Using Body Mapping to Understand Complex Support Needs                                                                                                           | Forum : Qualitative Social Research                                                  | 2018 | 19 | 2  |                                                                                                     |                                                                                                                                         | body mapping situation-elicitation |
| Durso, Francis T; Kazi, Sadaf; Ferguson, Ashley N                                                                          | The Threat-Strategy Interview. Conducting Ethnographic Research in Low Literate, Economically Weak Underserved Spaces: An Introduction to Iconic Legisigns-Guided Interviewing (ILGI) | Applied Ergonomics                                                                   | 2015 | 47 |    | 336-344                                                                                             | <a href="http://dx.doi.org/10.1016/j.apergo.2014.08.001">http://dx.doi.org/10.1016/j.apergo.2014.08.001</a>                             |                                    |
| Dutta Uttaran                                                                                                              |                                                                                                                                                                                       | International Journal of Qualitative Methods                                         | 2019 | 18 |    |                                                                                                     | <a href="http://dx.doi.org/10.1177/1609406919855279">http://dx.doi.org/10.1177/1609406919855279</a>                                     | object-elicitation                 |
| Dutton, S; Davison, C M; Malla, M; Bartels, S; Collier, K; Plamondon, K; Purkey, E                                         | Biographical Collage as a Tool in Inuit Community-Based Participatory Research and Capacity Development                                                                               | International Journal of Qualitative Methods                                         | 2019 | 18 |    |                                                                                                     | <a href="http://dx.doi.org/10.1177/1609406919877307">http://dx.doi.org/10.1177/1609406919877307</a>                                     | collage                            |
| Elliot, Dely Lazarte; Reid, Kate; Baumfield, Vivienne                                                                      | Capturing Visual Metaphors and Tales: Innovative or Elusive? Photography as a method of data collection: Helping people with long-term mental illness to convey their life world.     | International Journal of Research & Method in Education                              | 2017 | 40 | 5  | 480-496                                                                                             | <a href="http://dx.doi.org/10.1080/1743727X.2016.1181164">http://dx.doi.org/10.1080/1743727X.2016.1181164</a>                           | photo-elicitation                  |
| Erdner, Anette; Magnusson, Annabella                                                                                       |                                                                                                                                                                                       | Perspectives in Psychiatric Care                                                     | 2011 | 47 | 3  | 145-150                                                                                             | <a href="http://dx.doi.org/10.1111/j.1744-6163.2010.00283.x">http://dx.doi.org/10.1111/j.1744-6163.2010.00283.x</a>                     | photo-elicitation                  |
| Esin, Cigdem; Squire, Corinne                                                                                              | Visual Autobiographies in East London: Narratives of Still Images, Interpersonal Exchanges, and Intrapersonal Dialogues                                                               | Forum Qualitative Sozialforschung/Forum: Qualitative Social Research                 | 2013 | 14 | 2  |                                                                                                     |                                                                                                                                         | drawing; collage                   |
| Evans-Agnew, Robin A; Rosemberg, Marie-Anne S                                                                              | Questioning photovoice research: Whose voice?                                                                                                                                         | Qualitative Health Research                                                          | 2016 | 26 | 8  | 1019-1030                                                                                           | <a href="http://dx.doi.org/10.1177/1049732315624223">http://dx.doi.org/10.1177/1049732315624223</a>                                     | photo-elicitation                  |
| Fang, Mei Lan; Sixsmith, Judith; Woolrych, Ryan; Canham, Sarah L; Battersby, Lupin; Ren, Tori Hui; Sixsmith, Andrew        | Integrating sense of place within new housing developments: A community-based participatory research approach.                                                                        | Resilience and ageing: Creativity, culture and community.                            | 2018 |    |    | 129-156                                                                                             | <a href="http://dx.doi.org/10.1332/policypress/9781447340911.003.0007">http://dx.doi.org/10.1332/policypress/9781447340911.003.0007</a> | photo-elicitation                  |
| Fayette, Rainart; Bond, Caroline                                                                                           | A Systematic Literature Review of Qualitative Research Methods for Eliciting the Views of Young People with ASD about Their Educational Experiences                                   | European Journal of Special Needs Education                                          | 2018 | 33 | 3  | 349-365                                                                                             | <a href="http://dx.doi.org/10.1080/08856257.2017.1314111">http://dx.doi.org/10.1080/08856257.2017.1314111</a>                           | Review across categories           |
| Fearon Kriss                                                                                                               | âHave you ever talked to any women with Turner syndrome?â Using universal design and photo elicitation interviews in research with women with mild cognitive impairment           | Methodological Innovations                                                           | 2019 | 12 | 2  |                                                                                                     | <a href="http://dx.doi.org/10.1177/2059799119841933">http://dx.doi.org/10.1177/2059799119841933</a>                                     | photo-elicitation                  |
| Felsher, Marisa; Wiehe, Sarah E.; Gunn, Jayleen K. L.; Roth, Alexis M.                                                     | âI got it off my chestâ: An examination of how research participation improved the mental health of women engaging in transactional sex                                           | Community Mental Health Journal                                                      | 2018 | 54 | 2  | 171-179                                                                                             | <a href="http://dx.doi.org/10.1007/s10597-017-0094-y">http://dx.doi.org/10.1007/s10597-017-0094-y</a>                                   | diary                              |
| Filep, Crystal Victoria; Turner, Sarah; Eidse, Noelani; Thompson-Fawcett, Michelle; Fitzsimons, Sean                       | Advancing rigour in solicited diary research                                                                                                                                          | Qualitative Research                                                                 | 2018 | 18 | 4  | 451-470                                                                                             | <a href="http://dx.doi.org/10.1177/1468794117728411">http://dx.doi.org/10.1177/1468794117728411</a>                                     | diary                              |
| Fitt, Helen                                                                                                                | Researching mobile practices: Participant reflection and audio-recording in Repeat Question Diaries                                                                                   | Qualitative Research                                                                 | 2018 | 18 | 6  | 654-670                                                                                             | <a href="http://dx.doi.org/10.1177/1468794117743462">http://dx.doi.org/10.1177/1468794117743462</a>                                     | diary                              |
| Frith, Hannah                                                                                                              | Narrating biographical disruption and repair: Exploring the place of absent images in women's experiences of cancer and chemotherapy.                                                 | Visual methods in psychology: Using and interpreting images in qualitative research. | 2011 |    |    | 55-68                                                                                               |                                                                                                                                         | photo-elicitation                  |
| Fritz, Heather A.                                                                                                          | Learning to do better: The transactional model of diabetes self-management integration                                                                                                | Qualitative Health Research                                                          | 2015 | 25 | 7  | 875-886                                                                                             | <a href="http://dx.doi.org/10.1177/1049732314552453">http://dx.doi.org/10.1177/1049732314552453</a>                                     | photo-elicitation; diary           |

|                                                                                                                               |                                                                                                                                                                        |                                                                                                                 |    |              |                                                                                                               |                                                                                  |
|-------------------------------------------------------------------------------------------------------------------------------|------------------------------------------------------------------------------------------------------------------------------------------------------------------------|-----------------------------------------------------------------------------------------------------------------|----|--------------|---------------------------------------------------------------------------------------------------------------|----------------------------------------------------------------------------------|
| Fritz, Roschelle L; Vandermause, Roxanne                                                                                      | Data collection via in-depth email interviewing: Lessons from the field.                                                                                               | 2018 Qualitative Health Research                                                                                | 28 | 10 1640-1649 | <a href="http://dx.doi.org/10.1177/1049732316689067">http://dx.doi.org/10.1177/1049732316689067</a>           | writing (email)                                                                  |
| Fullana, Judit; Palliser, Maria; Vila, Montserrat                                                                             | Advancing towards inclusive social research: visual methods as opportunities for people with severe mental illness to participate in research                          | 2014 International Journal of Social Research Methodology                                                       | 17 | 6 723-738    | <a href="http://dx.doi.org/10.1080/13645579.2013.832049">http://dx.doi.org/10.1080/13645579.2013.832049</a>   | photo-elicitation; drawing                                                       |
| Futch, Valerie A; Fine, Michelle                                                                                              | Mapping as a method: History and theoretical commitments.                                                                                                              | 2014 Qualitative Research in Psychology                                                                         | 11 | 1 42-59      | <a href="http://dx.doi.org/10.1080/14780887.2012.719070">http://dx.doi.org/10.1080/14780887.2012.719070</a>   | mapping                                                                          |
| Galman, Sally A. C                                                                                                            | The truthful messenger: Visual methods and representation in qualitative research in education.                                                                        | 2009 Qualitative Research                                                                                       | 9  | 2 197-217    | <a href="http://dx.doi.org/10.1177/1468794108099321">http://dx.doi.org/10.1177/1468794108099321</a>           | drawing                                                                          |
| Garc a-a, Borja; Welford, Jo; Smith, Brett                                                                                    | Using a smartphone app in qualitative research: the good, the bad and the ugly                                                                                         | 2016 Qualitative Research Forum : Qualitative Social Research                                                   | 16 | 5 508-525    | <a href="http://dx.doi.org/10.1177/1468794115593335">http://dx.doi.org/10.1177/1468794115593335</a>           | photo-elicitation; diary                                                         |
| Gastaldo, Denise; Rivas-Quarneti, Natalia; Magalhaes, Lilian                                                                  | Body-Map Storytelling as a Health Research Methodology: Blurred Lines Creating Clear Pictures                                                                          | 2018 Research                                                                                                   | 19 | 2            |                                                                                                               | body mapping                                                                     |
| Genoe, M. Rebecca; Dupuis, Sherry L.                                                                                          | Picturing Leisure: Using Photovoice to Understand the Experience of Leisure and Dementia                                                                               | 2013 Qualitative Report Issues in Educational Research                                                          | 18 |              |                                                                                                               | photo-elicitation                                                                |
| Glass, Christine                                                                                                              | "There's Not Much Room for Anything to Go Amiss": Narrative and Arts-Based Inquiry in Teacher Education                                                                | 2011 International Journal of Qualitative Methods                                                               | 21 | 2 130-144    |                                                                                                               | drawing                                                                          |
| Glaw Xanthe; Inder, Kerry; Kable Ashley; Hazelton, Michael                                                                    | Visual Methodologies in Qualitative Research                                                                                                                           | 2017 Qualitative Methods Forum : Qualitative Social Research                                                    | 16 | 1            | <a href="http://dx.doi.org/10.1177/1609406917748215">http://dx.doi.org/10.1177/1609406917748215</a>           | photo-elicitation                                                                |
| Glenis, Mark; Boulton, Amohia                                                                                                 | Indigenising Photovoice: Putting M ori Cultural Values Into a Research Method                                                                                          | 2017 International Journal of Qualitative Methods                                                               | 18 | 3            | <a href="http://dx.doi.org/10.1177/16094069120110030">http://dx.doi.org/10.1177/16094069120110030</a>         | photo-elicitation                                                                |
| Goldman, Ellen F; Swayze, Susan                                                                                               | In-Depth Interviewing with Healthcare Corporate Elites: Strategies for Entry and Engagement                                                                            | 2012 Qualitative Methods                                                                                        | 11 | 3 230-243    | <a href="http://dx.doi.org/10.1177/16094069120110030">http://dx.doi.org/10.1177/16094069120110030</a>         | concept mapping                                                                  |
| Gonzales, Leslie D.; Rincones, Rodolfo                                                                                        | Using Participatory Action Research and Photo Methods to Explore Higher Education Administration as an Emotional Endeavor                                              | 2013 Qualitative Report                                                                                         | 18 |              |                                                                                                               | photo-elicitation                                                                |
| Goopy Suzanne; Kassin Anusha                                                                                                  | Arts-Based Engagement Ethnography: An Approach for Making Research Engaging and Knowledge Transferable When Working With Harder-to-Reach Communities                   | 2019 International Journal of Qualitative Methods Higher Education Research & Development                       | 18 |              | <a href="http://dx.doi.org/10.1177/1609406918820424">http://dx.doi.org/10.1177/1609406918820424</a>           | object-elicitation                                                               |
| Grellier, Jane                                                                                                                | Rhizomatic mapping: Spaces for learning in higher education.                                                                                                           | 2013 Development                                                                                                | 32 | 1 83-95      | <a href="http://dx.doi.org/10.1080/07294360.2012.750280">http://dx.doi.org/10.1080/07294360.2012.750280</a>   | mapping<br>photo-elicitation;<br>video-elicitation;<br>story-telling;<br>mapping |
| Gubrium, Aline; Harper, Krista Guell, Cornelia; Oglivie, David                                                                | Participatory visual and digital methods.<br>Picturing commuting: Photovoice and seeking well-being in everyday travel.                                                | 2013 Routledge                                                                                                  | 15 | 2 201-218    | <a href="http://dx.doi.org/10.1177/1468794112468472">http://dx.doi.org/10.1177/1468794112468472</a>           | photo-elicitation                                                                |
| Hadfield, Mark; Haw, Kaye                                                                                                     | Video: Modalities and Methodologies                                                                                                                                    | 2015 International Journal of Research & Method in Education                                                    | 35 | 3 311-324    | <a href="https://doi.org/10.1080/1743727X.2012.717434">https://doi.org/10.1080/1743727X.2012.717434</a>       | video-elicitation                                                                |
| Hall, Pamela D.; Bowen, Glenn A.                                                                                              | The Use of Photovoice for Exploring Students' Perspectives on Themselves and Others                                                                                    | 2012 Journal of Ethnographic & Health: An Interdisciplinary Journal for the Social Study of Health, Illness and | 9  | 3 196-208    |                                                                                                               | photo-elicitation;<br>photovoice                                                 |
| Han, Christina S; Oliffe, John L                                                                                              | Photovoice in mental illness research: A review and recommendations.                                                                                                   | 2015 Qualitative Research                                                                                       | 20 | 2 110-126    | <a href="http://dx.doi.org/10.1177/1363459314567790">http://dx.doi.org/10.1177/1363459314567790</a>           | photo-elicitation                                                                |
| Harley, Anne                                                                                                                  | Picturing Reality: Power, Ethics, and Politics in Using Photovoice                                                                                                     | 2012 International Journal of Qualitative Methods                                                               | 11 | 4 320-339    | <a href="http://dx.doi.org/10.1177/16094069120110040">http://dx.doi.org/10.1177/16094069120110040</a>         | photo-elicitation                                                                |
| Harris, Magdalena; Rhodes, Tim Hartel Jenna; Noone, Rebecca; Oh, Christie; Power, Stephanie; Danzanov Pavel; Kelly, Bridgette | "It's not much of a life": The benefits and ethics of using life history methods with people who inject drugs in qualitative harm reduction research.                  | 2018 Qualitative Health Research                                                                                | 28 | 7 1123-1134  | <a href="http://dx.doi.org/10.1177/1049732318764393">http://dx.doi.org/10.1177/1049732318764393</a>           | timeline; life grid                                                              |
| Harvey, Laura                                                                                                                 | The iSquare protocol: combining research, art, and pedagogy through the draw-and-write technique                                                                       | 2018 Qualitative Research                                                                                       | 18 | 4 433-450    | <a href="http://dx.doi.org/10.1177/1468794117722193">http://dx.doi.org/10.1177/1468794117722193</a>           | drawing                                                                          |
| Hegarty, Ann                                                                                                                  | Intimate reflections: Private diaries in qualitative research                                                                                                          | 2011 Qualitative Research Adult Learner: The Irish Journal of Adult and Community Education                     | 11 | 6 664-682    | <a href="http://dx.doi.org/10.1177/1468794111415959">http://dx.doi.org/10.1177/1468794111415959</a>           | diary                                                                            |
| Hellzen, Ove; Haugenes, Marit;  stby, May                                                                                     | Photovoice: Facilitating Fathers' Narratives of Care                                                                                                                   | 2016 International Journal of Qualitative Studies on Health and Well-being                                      | 13 | 1 9          | <a href="http://dx.doi.org/10.1080/17482631.2018.1468198">http://dx.doi.org/10.1080/17482631.2018.1468198</a> | photo-elicitation<br>vignette                                                    |
| Henry, Stephen G.; Fetters, Michael D.                                                                                        |  t It my home and your work : The views of a filmed vignette describing a challenging everyday situation from the perspective of people with intellectual disabilities | 2018 Annals of Family Medicine                                                                                  | 10 | 2 118-125    | <a href="http://dx.doi.org/10.1370/afm.1339">http://dx.doi.org/10.1370/afm.1339</a>                           | video-elicitation                                                                |
| Herbst, Patricio; Chazan, Daniel                                                                                              | Video elicitation interviews: A qualitative research method for investigating physician-patient interactions                                                           | 2015 International Journal of Research & Method in Education                                                    | 38 | 3 272-287    | <a href="http://dx.doi.org/10.1080/1743727X.2015.1025742">http://dx.doi.org/10.1080/1743727X.2015.1025742</a> | storyboard;<br>cartoons                                                          |

|                                                                                        |                                                                                                                                                  |                                                                                                    |      |     |             |                                                                                                                     |                               |
|----------------------------------------------------------------------------------------|--------------------------------------------------------------------------------------------------------------------------------------------------|----------------------------------------------------------------------------------------------------|------|-----|-------------|---------------------------------------------------------------------------------------------------------------------|-------------------------------|
| Hergenrather, Kenneth C; Rhodes, Scott D; Cowan, Chris A; Bardhoshi, Gerta; Pula, Sara | Photovoice as community-based participatory research: A qualitative review.                                                                      | American Journal of Health Behavior                                                                | 2009 | 33  | 6 686-698   | <a href="http://dx.doi.org/10.5993/AJHB.33.6.6">http://dx.doi.org/10.5993/AJHB.33.6.6</a>                           | photo-elicitation             |
| Hermanns, Melinda; Greer, Danice B; Cooper, Cheryl                                     | Visions of Living with Parkinson's Disease: A Photovoice Study                                                                                   | The Qualitative Report                                                                             | 2015 | 20  | 3 336-355   |                                                                                                                     | photo-elicitation             |
| Herron, Rachel; Dansereau, Lisette; Wrathall, Meghan; Funk, Laura; Spencer, Dale       | Using a flexible diary method rigorously and sensitively with family carers                                                                      | Qualitative Health Research International Journal of Qualitative Studies in Education (QSE)        | 2019 | 29  | 7 1004-1015 | <a href="http://dx.doi.org/10.1177/1049732318816081">http://dx.doi.org/10.1177/1049732318816081</a>                 | diary                         |
| Higgins, Marc                                                                          | Placing Photovoice under Erasure: A Critical and Complicit Engagement with What It Theoretically Is (Not)                                        | Australian Journal of Indigenous Education                                                         | 2016 | 29  | 5 670-685   | <a href="http://dx.doi.org/10.1080/09518398.2016.1145276">http://dx.doi.org/10.1080/09518398.2016.1145276</a>       | photo-elicitation             |
| Higgins, Marc                                                                          | Rebraiding Photovoice: Methodological MÃ©tissage at the Cultural Interface                                                                       | Indigenous Education                                                                               | 2014 | 43  | 2 208-217   | <a href="http://dx.doi.org/10.1017/jie.2014.18">http://dx.doi.org/10.1017/jie.2014.18</a>                           | photo-elicitation             |
| Hinthorne, Lauren Leigh                                                                | A Picture Is Worth a Thousand Words: Using the Visual Interpretation Narrative Exercise to Elicit Non-Elite Perceptions of Democracy             | Field Methods Visual methods in psychology: Using and interpreting images in qualitative research. | 2012 | 24  | 3 348-364   | <a href="http://dx.doi.org/10.1177/1525822X12444065">http://dx.doi.org/10.1177/1525822X12444065</a>                 | cartoons                      |
| Hodgetts, Darrin; Chamberlain, Kerry; Groot, Shiloh                                    | Reflections on the visual in community research and action.                                                                                      | The Sociological Review                                                                            | 2011 | 60  | 299-313     |                                                                                                                     | photo-elicitation             |
| Holgate, Jane; Keles, Janroj; Kumarappan, Leena                                        | Visualizing 'community': an experiment in participatory photography among Kurdish diasporic workers in London                                    | The Sociological Review                                                                            | 2012 | 60  | 2 312       | <a href="http://dx.doi.org/10.1111/j.1467-954X.2012.02075.x">http://dx.doi.org/10.1111/j.1467-954X.2012.02075.x</a> | photo-elicitation             |
| Holland, Sierra                                                                        | Pregnant with possibility: The importance of visual data in (re)presenting queer women's experiences of reproduction                             | Methodological Innovations                                                                         | 2019 | 12  | 1           | <a href="http://dx.doi.org/10.1177/2059799119829429">http://dx.doi.org/10.1177/2059799119829429</a>                 | photo-elicitation             |
| Holley, Jessica; Gillard, Steven                                                       | Developing and using vignettes to explore the relationship between risk management practice and recovery-oriented care in mental health services | Qualitative Health Research                                                                        | 2018 | 28  | 3 371-380   | <a href="http://dx.doi.org/10.1177/1049732317725284">http://dx.doi.org/10.1177/1049732317725284</a>                 | vignette                      |
| Hollomotz Andrea                                                                       | Successful interviews with people with intellectual disability                                                                                   | Qualitative Research The Oxford handbook of qualitative research.                                  | 2018 | 18  | 2 153-170   | <a href="http://dx.doi.org/10.1177/1468794117713810">http://dx.doi.org/10.1177/1468794117713810</a>                 | photo-elicitation; vignette   |
| Holm, Gunilla                                                                          | Photography as a research method.                                                                                                                | International Journal of Qualitative Studies in Education (QSE)                                    | 2014 | 25  | 380-402     |                                                                                                                     | photo-elicitation             |
| Holt, Brenda Southerland                                                               | Creating Interpretive Visual Texts                                                                                                               | Education (QSE)                                                                                    | 2012 | 25  | 5 665-679   | <a href="http://dx.doi.org/10.1080/09518398.2010.539580">http://dx.doi.org/10.1080/09518398.2010.539580</a>         | photo-elicitation             |
| Impellizzeri, Jonathan; Savinsky, David M; King, John A; Leitch-Alford, Linda          | Conceptual mapping task: An effective verification tool for qualitative counseling research.                                                     | Counseling Outcome Research and Evaluation                                                         | 2017 | 8   | 1 31-47     | <a href="http://dx.doi.org/10.1080/21501378.2017.1327745">http://dx.doi.org/10.1080/21501378.2017.1327745</a>       | concept mapping               |
| Jalan, Ishan                                                                           | Researching dark emotions: Eliciting stories of envy. Methods of exploring emotions                                                              | Routledge International Journal of Qualitative Studies in Education (QSE)                          | 2015 | 28  | 8 989-1004  | <a href="http://dx.doi.org/10.1080/09518398.2014.940412">http://dx.doi.org/10.1080/09518398.2014.940412</a>         | Review across categories      |
| Janzen, Melanie D.                                                                     | (Re)searching Methods: Reading Fiction in Literary Response Groups                                                                               | British Journal of Management                                                                      | 2015 | 30  | 3 748-763   | <a href="http://dx.doi.org/10.1111/1467-8551.12339">http://dx.doi.org/10.1111/1467-8551.12339</a>                   | storytelling                  |
| Jaspersen, Lena J; Stein, Christian                                                    | Beyond the matrix: Visual methods for qualitative network research.                                                                              | Journal of Mixed Methods Research                                                                  | 2019 | 4   | 4 313-341   | <a href="http://dx.doi.org/10.1177/1558689810380920">http://dx.doi.org/10.1177/1558689810380920</a>                 | mapping                       |
| Jehn, Karen A; Jonsen, Karsten                                                         | A multimethod approach to the study of sensitive organizational issues.                                                                          | Qualitative Research The Cambridge handbook of play: Developmental and disciplinary perspectives.  | 2010 | 10  | 2 175-198   | <a href="http://dx.doi.org/10.1177/1468794109356737">http://dx.doi.org/10.1177/1468794109356737</a>                 | mapping                       |
| Jenkins, Nicholas; Bloor, Michael; Fischer, Jan; Berney, Lee; Neale, Joanne            | Putting it in context: The use of vignettes in qualitative interviewing                                                                          | The Cambridge handbook of play: Developmental and disciplinary perspectives.                       | 2010 | 10  | 2 175-198   | <a href="http://dx.doi.org/10.1177/1468794109356737">http://dx.doi.org/10.1177/1468794109356737</a>                 | vignette                      |
| Johnson, James E; Dong, Pool Ip                                                        | Methods of studying play.                                                                                                                        | Visual methods in psychology: Using and interpreting images in qualitative research.               | 2019 | 29  | 399-415     |                                                                                                                     | photo-elicitation; drawing    |
| Johnson, Katherine                                                                     | Visualising mental health with an LGBT community group: Method, process, theory.                                                                 | qualitative research.                                                                              | 2011 | 29  | 173-189     |                                                                                                                     | photo-elicitation             |
| Johnson, Kayla M.                                                                      | Hotdog as Metaphor: (Co)Developing Stories of Learning through Photo-Cued Interviewing                                                           | Teachers College Record                                                                            | 2020 | 122 | 9           |                                                                                                                     | photo-elicitation             |
| Jones, Adam; Woolley, Janet                                                            | The email-diary: A promising research tool for the 21st century?                                                                                 | Qualitative Research                                                                               | 2015 | 15  | 6 705-721   | <a href="http://dx.doi.org/10.1177/1468794114561347">http://dx.doi.org/10.1177/1468794114561347</a>                 | diary                         |
| Joseph, Tatiana                                                                        | "We Have Rights, and We Can Make It Right:" Application of Photovoice as Tool of Empowerment with Low Income Latinx Students                     | Journal of Ethnographic & Qualitative Research                                                     | 2017 | 11  | 4 293-304   |                                                                                                                     | photo-elicitation; photovoice |
| Kalo, Zsuzsa; Racz, Jozsef                                                             | Map task, a new method for improving needle exchange services.                                                                                   | Journal of Substance Use                                                                           | 2013 | 18  | 1 46-55     | <a href="http://dx.doi.org/10.3109/14659891.2012.735897">http://dx.doi.org/10.3109/14659891.2012.735897</a>         | mapping                       |

| Author(s)                                                                    | Title                                                                                                                                                                                                        | Year | Journal                                                                                                           | Volume  | Issue  | Pages     | DOI                                                                                                                 | Method            |
|------------------------------------------------------------------------------|--------------------------------------------------------------------------------------------------------------------------------------------------------------------------------------------------------------|------|-------------------------------------------------------------------------------------------------------------------|---------|--------|-----------|---------------------------------------------------------------------------------------------------------------------|-------------------|
| Kalter, Steve                                                                | Using projectives to uncover "Aha moments" in qualitative research.                                                                                                                                          | 2016 | Qualitative research methods in consumer psychology: Ethnography and culture. Forum : Qualitative Social Research | 131-146 |        |           | <a href="http://dx.doi.org/10.1207/S15327752JPA7903_03">http://dx.doi.org/10.1207/S15327752JPA7903_03</a>           | photo-elicitation |
| Kandemir, Asli; Budd, Richard                                                | Using Vignettes to Explore Reality and Values With Young People                                                                                                                                              | 2018 | Research                                                                                                          | 19      | 2      |           |                                                                                                                     | vignette          |
| Kang, Timothy; Kruttschnitt, Candace; Goodman, Philip                        | Multi-Method Synergy: Using the Life History Calendar and Life as a Film for Retrospective Narratives                                                                                                        | 2017 | Crime and Justice                                                                                                 | 56      | 4      | 532-553   | <a href="http://dx.doi.org/10.1111/hojo.12231">http://dx.doi.org/10.1111/hojo.12231</a>                             | life grid         |
| Kaplan, Abram W.                                                             | Shifting Paradigms in Environmental Research Methods through the Visual Arts                                                                                                                                 | 2020 | Practice                                                                                                          | 19      | 2      | 115-143   | <a href="https://doi.org/10.1177/1474022218787158">https://doi.org/10.1177/1474022218787158</a>                     | photo-elicitation |
| Kingsley, Joanne                                                             | Visual methodology in classroom inquiry: Enhancing complementary qualitative research designs.                                                                                                               | 2009 | Alberta Journal of Educational Research                                                                           | 55      | 4      | 534-548   |                                                                                                                     | photo-elicitation |
| Klein, Maïke; Milner, Rebecca J                                              | The use of body-mapping in interpretative phenomenological analyses: a methodological discussion                                                                                                             | 2019 | International Journal of Social Research Methodology                                                              | 22      | 5      | 533-543   | <a href="http://dx.doi.org/10.1080/13645579.2019.1593378">http://dx.doi.org/10.1080/13645579.2019.1593378</a>       | body mapping      |
| Kolar Kat; Farah, Ahmad; Chan, Linda; Erickson, Patricia G                   | Timeline Mapping in Qualitative Interviews: A Study of Resilience with Marginalized Groups                                                                                                                   | 2015 | International Journal of Qualitative Methods                                                                      | 14      | 3      | 13-32     | <a href="http://dx.doi.org/10.1177/160940691501400302">http://dx.doi.org/10.1177/160940691501400302</a>             | timeline          |
| Koopman-Boyden, Peggy; Richardson, Margaret                                  | An evaluation of mixed methods (diaries and focus groups) when working with older people                                                                                                                     | 2013 | Practice                                                                                                          | 16      | 5      | 389-401   | <a href="http://dx.doi.org/10.1080/13645579.2012.716971">http://dx.doi.org/10.1080/13645579.2012.716971</a>         | diary             |
| Lahlou, Saadi; Le Bellu, Sophie; Boesen-Mariani, Sabine                      | Subjective Evidence Based Ethnography: Method and applications.                                                                                                                                              | 2015 | Integrative Psychological & Behavioral Science                                                                    | 49      | 2      | 216-238   | <a href="http://dx.doi.org/10.1007/s12124-014-9288-9">http://dx.doi.org/10.1007/s12124-014-9288-9</a>               | video-elicitation |
| Lang, Michael; Laing, Catherine; Moules, Nancy; Estefan, Andrew              | Words, Camera, Music, Action: A Methodology of Digital Storytelling in a Health Care Setting                                                                                                                 | 2019 | Qualitative Methods                                                                                               | 18      |        |           | <a href="http://dx.doi.org/10.1177/1609406919863241">http://dx.doi.org/10.1177/1609406919863241</a>                 | story-telling     |
| Lapatin, Sheri; Goncalves, Marta; Nillni, Anna; Chavez, Ligia; Quinn, Roxana |                                                                                                                                                                                                              |      |                                                                                                                   |         |        |           |                                                                                                                     |                   |
| Llerena, Green, Alexander; Alegria, Margarita                                | Lessons from the use of vignettes in the study of mental health service disparities.                                                                                                                         | 2012 | Health Services Research                                                                                          | 47      | 3, Pt2 | 1345-1362 | <a href="http://dx.doi.org/10.1111/j.1475-6773.2011.01360.x">http://dx.doi.org/10.1111/j.1475-6773.2011.01360.x</a> | vignette          |
| Latz, Amanda O.; Phelps-Ward, Robin; Royer, Dan; Peters, Tiffany             | Photovoice as Methodology, Pedagogy, and Partnership-Building Tool: A Graduate and Community College Student Collaboration                                                                                   | 2016 | Journal of Public Scholarship in Higher Education                                                                 | 6       |        | 124-142   |                                                                                                                     | photo-elicitation |
| Laukkanen, Mauri                                                             | Comparative Causal Mapping and CMAP3 Software in Qualitative Studies                                                                                                                                         | 2012 | Qualitative Social Research                                                                                       | 13      | 2      |           |                                                                                                                     | mapping           |
| LeBaron, Curtis; Jarzabkowski, Paula; Pratt, Michael G; Fetzer, Greg         | An introduction to video methods in organizational research.                                                                                                                                                 | 2018 | Methods                                                                                                           | 21      | 2      | 239-260   | <a href="http://dx.doi.org/10.1177/1094428117745649">http://dx.doi.org/10.1177/1094428117745649</a>                 | video-elicitation |
| Lee-Ann, Fenge; Jones, Kip; Read, Rosie                                      | Connecting Participatory Methods in a Study of Older Lesbian and Gay Citizens in Rural Areas                                                                                                                 | 2010 | International Journal of Qualitative Methods                                                                      | 9       | 4      | 320-333   | <a href="http://dx.doi.org/10.1177/160940691000900402">http://dx.doi.org/10.1177/160940691000900402</a>             | photo-elicitation |
| Leigh, Jadwiga; Morriss, Lisa; Morriss, Matthew                              | Making visible an invisible trade: Exploring the everyday experiences of doing social work and being a social worker                                                                                         | 2020 | Qualitative Social Work                                                                                           | 19      | 2      | 267-283   | <a href="http://dx.doi.org/10.1177/1473325018824629">http://dx.doi.org/10.1177/1473325018824629</a>                 | photo-elicitation |
| Levell Jade                                                                  | Those songs were the ones that made me, nobody asked me this question before: Music Elicitation with ex-gang involved men about their experiences of childhood domestic violence and abuse                   | 2019 | International Journal of Qualitative Methods                                                                      | 18      |        |           | <a href="http://dx.doi.org/10.1177/1609406919852010">http://dx.doi.org/10.1177/1609406919852010</a>                 | music videos      |
| Li, Bing Yu; Ho Rainbow Tin Hung                                             | Unveiling the Unspeakable: Integrating Video Elicitation Focus Group Interviews and Participatory Video in an Action Research Project on Dementia Care Development                                           | 2019 | International Journal of Qualitative Methods                                                                      | 18      |        |           | <a href="http://dx.doi.org/10.1177/1609406919830561">http://dx.doi.org/10.1177/1609406919830561</a>                 | video-elicitation |
| Lowery, Damon R; Morse, Wayne C                                              | A Qualitative Method for Collecting Spatial Data on Important Places for Recreation, Livelihoods, and Ecological Meanings: Integrating Focus Groups with Public Participation Geographic Information Systems | 2013 | Society and Natural Resources                                                                                     | 26      | 12     | 1422-1437 | <a href="http://dx.doi.org/10.1080/08941920.2013.819954">http://dx.doi.org/10.1080/08941920.2013.819954</a>         | mapping           |
| Lynch, Jonathan; Mannion, Greg                                               | Enacting a Place-Responsive Research Methodology: Walking Interviews with Educators                                                                                                                          | 2016 | Journal of Adventure Education and Outdoor Learning                                                               | 16      | 4      | 330-345   | <a href="http://dx.doi.org/10.1080/14729679.2016.1163271">http://dx.doi.org/10.1080/14729679.2016.1163271</a>       | walking           |
| Majumdar, Anamika                                                            | Using photographs of places, spaces and objects to explore South Asian women's experience of close relationships and marriage.                                                                               | 2011 | qualitative research.                                                                                             |         |        | 69-84     |                                                                                                                     | photo-elicitation |
| Mannay, Dawn; Morgan, Melanic                                                | Doing ethnography or applying a qualitative technique? Reflections from the 'waiting field'.                                                                                                                 | 2015 | Qualitative Research                                                                                              | 15      | 2      | 166-182   | <a href="http://dx.doi.org/10.1177/1468794113517391">http://dx.doi.org/10.1177/1468794113517391</a>                 | photo-elicitation |

|                                                                                                                                              |                                                                                                                                                               |                                                                                                               |    |             |                                                                                                               |                                      |
|----------------------------------------------------------------------------------------------------------------------------------------------|---------------------------------------------------------------------------------------------------------------------------------------------------------------|---------------------------------------------------------------------------------------------------------------|----|-------------|---------------------------------------------------------------------------------------------------------------|--------------------------------------|
| Mapp, Fiona                                                                                                                                  | Reflections on Using a Flash Card Activity for Studying Social Representations of Sexually Transmitted Infections                                             | International Journal of Qualitative Methods                                                                  | 16 | 1           | <a href="http://dx.doi.org/10.1177/1609406917703741">http://dx.doi.org/10.1177/1609406917703741</a>           | drawing (flash cards)                |
| Marsh, Wendy; Leamon, Jen; Robinson, Ann; Shawe, Jill                                                                                        | LEARNS: A creative approach to analysing and representing narrative data incorporating photo-elicitation techniques.                                          | Journal of Research in Nursing                                                                                | 23 | 4 334-343   | <a href="http://dx.doi.org/10.1177/1744987117750218">http://dx.doi.org/10.1177/1744987117750218</a>           | photo-elicitation                    |
| Martiniello, Marco                                                                                                                           | Visual sociology approaches in migration, ethnic and racial studies                                                                                           | 2018 Ethnic and Racial Studies                                                                                | 40 | 8 1184-1190 | <a href="http://dx.doi.org/10.1080/01419870.2017.1295163">http://dx.doi.org/10.1080/01419870.2017.1295163</a> | Review across categories             |
| McDonnell, Liz; Scott, Susie; Dawson, Matt                                                                                                   | A multidimensional view? Evaluating the different and combined contributions of diaries and interviews in an exploration of asexual identities and intimacies | 2017 Qualitative Research                                                                                     | 17 | 5 520-536   | <a href="http://dx.doi.org/10.1177/1468794116676516">http://dx.doi.org/10.1177/1468794116676516</a>           | diary                                |
| McGrath, Laura; Mullarkey, Shauna; Reavey, Paula                                                                                             | Building visual worlds: Using maps in qualitative psychological research on affect and emotion.                                                               | Qualitative Research in Psychology                                                                            | 17 | 1 75-97     | <a href="http://dx.doi.org/10.1080/14780887.2019.1577517">http://dx.doi.org/10.1080/14780887.2019.1577517</a> | mapping                              |
| Meck, Chongo; Chase, Robert M; Lavoie, JosÃ© G; Harder, H G; Mignone, Javier                                                                 | The Life Story Board as a Tool for Qualitative Research                                                                                                       | International Journal of Qualitative Methods                                                                  | 17 | 1           | <a href="http://dx.doi.org/10.1177/1609406917752440">http://dx.doi.org/10.1177/1609406917752440</a>           | life grid                            |
| Melnikova, Olga T; Khoroshilov, Dmitry A                                                                                                     | Priority research directions in the area of qualitative methodology.                                                                                          | Psychology in Russia: State of the Art                                                                        | 3  | 46-72       | <a href="http://dx.doi.org/10.11621/pir.2010.0002">http://dx.doi.org/10.11621/pir.2010.0002</a>               | drawing                              |
| Metcalf, Amy Scott                                                                                                                           | Visual Juxtaposition as Qualitative Inquiry in Educational Research                                                                                           | International Journal of Qualitative Studies in Education (QSE)                                               | 28 | 2 151-167   | <a href="http://dx.doi.org/10.1080/09518398.2013.855340">http://dx.doi.org/10.1080/09518398.2013.855340</a>   | photo-elicitation                    |
| Migliorini, Laura; Rania, Nadia                                                                                                              | A qualitative method to "make visible" the world of intercultural relationships: The photovoice in social psychology.                                         | Qualitative Research in Psychology                                                                            | 14 | 2 131-145   | <a href="http://dx.doi.org/10.1080/14780887.2016.1263698">http://dx.doi.org/10.1080/14780887.2016.1263698</a> | photo-elicitation                    |
| Mignone, Javier; Chase, Robert M; Roger, Kerstin                                                                                             | A Graphic and Tactile Data Elicitation Tool for Qualitative Research: The Life Story Board                                                                    | Forum : Qualitative Social Research                                                                           | 20 | 2           |                                                                                                               | life grid                            |
| Mitchell, Claudia; Lamb, Pamela; Raissadat Haleh                                                                                             | Exploring the Impact of Youth-Produced Images on Family, Community, and Policy                                                                                | International Journal of Qualitative Methods                                                                  | 17 | 1           | <a href="http://dx.doi.org/10.1177/1609406918807609">http://dx.doi.org/10.1177/1609406918807609</a>           | vignette; photo-elicitation          |
| Mitchell, Michael A; Hedayati, Daniel O; Rodriguez, Keri L; Gordon, Adam J; Broyles, Lauren M; True, Gala; Balbale, Salva N; Conley, James W | Logistical Lessons Learned in Designing and Executing a Photo-Elicitation Study in the Veterans Health Administration                                         | 2016 The Qualitative Report                                                                                   | 21 | 7 1303-1315 |                                                                                                               | photo-elicitation                    |
| Molden, Olivia C.                                                                                                                            | Short Take: Story-Mapping Experiences                                                                                                                         | 2020 Field Methods                                                                                            | 32 | 2 131-139   | <a href="https://doi.org/10.1177/1525822X19877381">https://doi.org/10.1177/1525822X19877381</a>               | story-telling; mapping               |
| Mulvale Gillian; Moll, Sandra; Miatello Ashleigh; Murray-Leung, Louise; Rogerson Karlie; Sassi, Roberto B                                    | Co-designing Services for Youth With Mental Health Issues: Novel Elicitation Approaches                                                                       | International Journal of Qualitative Methods                                                                  | 18 |             | <a href="http://dx.doi.org/10.1177/1609406918816244">http://dx.doi.org/10.1177/1609406918816244</a>           | mapping                              |
| Mulvey, Michael S; Kavalam, Beena E                                                                                                          | Mining deeper meaning in consumer decision maps.                                                                                                              | Qualitative Market Research: An International Journal                                                         | 13 | 4 372-388   | <a href="http://dx.doi.org/10.1108/13522751011078809">http://dx.doi.org/10.1108/13522751011078809</a>         | metaphor                             |
| Murawska, Jaclyn M.; Walker, David A.                                                                                                        | Visual Tools for Eliciting Connections and Cohesiveness in Mixed Methods Research                                                                             | Mid-Western Educational Researcher                                                                            | 29 | 3 274-290   |                                                                                                               | diagram                              |
| Murray, Linda; Nash, Meredith                                                                                                                | The challenges of participant photography: A critical reflection on methodology and ethics in two cultural contexts.                                          | 2017 Qualitative Health Research                                                                              | 27 | 6 923-937   | <a href="http://dx.doi.org/10.1177/1049732316668819">http://dx.doi.org/10.1177/1049732316668819</a>           | photo-elicitation                    |
| Nathan Stephens Griffin                                                                                                                      | Comics and visual biography: sequential art in social research                                                                                                | <a href="http://dx.doi.org/10.1080/1472586X.2019.1691940">http://dx.doi.org/10.1080/1472586X.2019.1691940</a> | 34 | 4 319-335   |                                                                                                               | comic                                |
| Nicholas, Maria                                                                                                                              | Affordances of Using Multiple Videoed Events to Construct a Rich Understanding of Adult-Child Book Readings                                                   | International Journal of Research & Method in Education                                                       | 41 | 2 125-141   | <a href="https://doi.org/10.1080/1743727X.2016.1254176">https://doi.org/10.1080/1743727X.2016.1254176</a>     | video-elicitation                    |
| Nind, Melanie; Kilburn, Daniel; Wiles, Rose                                                                                                  | Using Video and Dialogue to Generate Pedagogic Knowledge: Teachers, Learners and Researchers Reflecting Together on the Pedagogy of Social Research Methods   | International Journal of Social Research Methodology                                                          | 18 | 5 561-576   | <a href="https://doi.org/10.1080/13645579.2015.1062628">https://doi.org/10.1080/13645579.2015.1062628</a>     | video-elicitation; stimulated recall |
| Nind, Melanie; Vinha, Hilra                                                                                                                  | Creative interactions with data: using visual and metaphorical devices in repeated focus groups                                                               | 2016 Qualitative Research                                                                                     | 16 | 1 26-Sep    | <a href="http://dx.doi.org/10.1177/1468794114557993">http://dx.doi.org/10.1177/1468794114557993</a>           | poetry; metaphor                     |
| Nordstrom, Susan Naomi                                                                                                                       | Object-Interviews: Folding, Unfolding, and Refolding Perceptions of Objects                                                                                   | International Journal of Qualitative Methods                                                                  | 12 | 1 237-257   | <a href="http://dx.doi.org/10.1177/16094069130120011">http://dx.doi.org/10.1177/16094069130120011</a>         | object-elicitation                   |
| Novek, Sheila; Morris-Oswald, Toni; Menece, Verena                                                                                           | Using photovoice with older adults: Some methodological strengths and issues.                                                                                 | 2012 Ageing & Society                                                                                         | 32 | 3 451-470   | <a href="http://dx.doi.org/10.1017/S0144686X11000377">http://dx.doi.org/10.1017/S0144686X11000377</a>         | photo-elicitation                    |
| Nykiforuk Candace I; Vallianatos, Helen; Nieuwendyk, Laura M                                                                                 | Photovoice as a Method for Revealing Community Perceptions of the Built and Social Environment                                                                | International Journal of Qualitative Methods                                                                  | 10 | 2 103-124   | <a href="http://dx.doi.org/10.1177/160940691101000201">http://dx.doi.org/10.1177/160940691101000201</a>       | photo-elicitation                    |
| O'Brien, Mark; Varga-Atkins, Tunde; Umoquit, Muriah; Tso, Peggy                                                                              | Cultural-Historical Activity Theory and "The Visual" in Research: Exploring the Ontological Consequences of the Use of Visual Methods                         | International Journal of Research & Method in Education                                                       | 35 | 3 251-268   | <a href="http://dx.doi.org/10.1080/1743727X.2012.717433">http://dx.doi.org/10.1080/1743727X.2012.717433</a>   | drawing                              |



|                                                                                                                                                            |                                                                                                                                                                                                                                                                            |                                                                                        |    |    |           |                                                                                                               |                               |
|------------------------------------------------------------------------------------------------------------------------------------------------------------|----------------------------------------------------------------------------------------------------------------------------------------------------------------------------------------------------------------------------------------------------------------------------|----------------------------------------------------------------------------------------|----|----|-----------|---------------------------------------------------------------------------------------------------------------|-------------------------------|
| O'Malley, Lori J.; Munsell, Sonya E.                                                                                                                       | PhotoVoice: An Innovative Qualitative Method in Research and Classroom Teaching                                                                                                                                                                                            | Educational Research: 2020 Theory and Practice                                         | 31 | 1  | 26-32     |                                                                                                               | photo-elicitation; photovoice |
| Orr, Noreen; Phoenix, Cassandra                                                                                                                            | Photographing physical activity: using visual methods to 'grasp at' the sensual experiences of the ageing body                                                                                                                                                             | 2015 Qualitative Research                                                              | 15 | 4  | 454-472   | <a href="http://dx.doi.org/10.1177/1468794114543401">http://dx.doi.org/10.1177/1468794114543401</a>           | photo-elicitation             |
| Ortega-Alcazar, Iliana; Dyck, Isabel                                                                                                                       | Migrant narratives of health and well-being: Challenging 'othering' processes through photo-elicitation interviews.                                                                                                                                                        | 2012 Critical Social Policy Equity & Excellence in                                     | 32 | 1  | 106-125   | <a href="http://dx.doi.org/10.1177/0261018311425981">http://dx.doi.org/10.1177/0261018311425981</a>           | photo-elicitation             |
| Osei-Kofi, Nana                                                                                                                                            | The Emancipatory Potential of Arts-Based Research for Social Justice Vignette selection for ethical reflections: A selection procedure for vignettes to investigate staff reflections on the ethical challenges in interaction with people with intellectual disabilities. | 2013 Education                                                                         | 46 | 1  | 135-149   | <a href="http://dx.doi.org/10.1080/10665684.2013.750202">http://dx.doi.org/10.1080/10665684.2013.750202</a>   | photo-elicitation             |
| Ostby, May; Bjorkly, Stal                                                                                                                                  | Capturing Undergraduate Experience through Participant-Generated Video                                                                                                                                                                                                     | 2011 Ethics and Social Welfare                                                         | 5  | 3  | 277-295   | <a href="http://dx.doi.org/10.1080/17496535.2010.550129">http://dx.doi.org/10.1080/17496535.2010.550129</a>   | vignette                      |
| O'Toole, Paddy                                                                                                                                             | Mixed Method Approaches in Open-Ended, Qualitative, Exploratory Research Involving People with Intellectual Disabilities: A Comparative Methods Study                                                                                                                      | 2013 The Qualitative Report Journal of Intellectual Disabilities                       | 18 | 33 |           |                                                                                                               | diary                         |
| Ottmann, Goetz; Crosbie, Jenny                                                                                                                             | Engaging without exposing: Use of a fictional character to facilitate mental health talk in focus groups with men who have been subject to the criminal justice system                                                                                                     | 2018 Qualitative Health Research                                                       | 28 | 13 | 2102-2114 | <a href="http://dx.doi.org/10.1177/1049732318785359">http://dx.doi.org/10.1177/1049732318785359</a>           | vignette                      |
| Owens, Christabel; Carter, Mary; Shenton, Deborah; Byng, Richard; Quinn, Cath                                                                              | Feasibility of using a video diary methodology with older African Americans living alone                                                                                                                                                                                   | 2019 Qualitative Social Work Journal of Public Policy &                                | 18 | 3  | 397-416   | <a href="http://dx.doi.org/10.1177/1473325017729570">http://dx.doi.org/10.1177/1473325017729570</a>           | diary                         |
| Owens, Otis L; Beer, Jenay M; Revels Asa; Levkoff, Sue                                                                                                     | Transformative photography: Evaluation and best practices for eliciting social and policy changes.                                                                                                                                                                         | 2013 Marketing International Journal of                                                | 32 | 1  | 45-65     | <a href="http://dx.doi.org/10.1509/jppm.11.161">http://dx.doi.org/10.1509/jppm.11.161</a>                     | photo-elicitation             |
| Ozanne, Julie L; Moscato, Emily M; Kunkel, Danylle R                                                                                                       | A Literature Review to Evaluate the Choice and Use of Visual Methods                                                                                                                                                                                                       | 2012 Qualitative Methods                                                               | 11 | 4  | 303-319   | <a href="http://dx.doi.org/10.1177/160940691201100401">http://dx.doi.org/10.1177/160940691201100401</a>       | Review across categories      |
| Pain, Helen                                                                                                                                                | Mandalas as a visual research method for understanding primary care for depression                                                                                                                                                                                         | International Journal of                                                               |    |    |           | <a href="http://dx.doi.org/10.1080/13645579.2013.796764">http://dx.doi.org/10.1080/13645579.2013.796764</a>   | drawing (graphic-elicitation) |
| Palmer, Victoria J; Dowrick, Christopher; Gunn, Jane M                                                                                                     | Venturing into the visual voice: Combining photos and interviews in phenomenological inquiry around marginalisation and chronic illness.                                                                                                                                   | 2014 Social Research Methodology Qualitative Research in                               | 17 | 5  | 527-541   | <a href="http://dx.doi.org/10.1080/14780887.2017.1329364">http://dx.doi.org/10.1080/14780887.2017.1329364</a> | photo-elicitation             |
| Papaloukas, Periklis; Quincey, Kerry; Williamson, Iain R                                                                                                   | Sensitive Inquiry in Mental Health                                                                                                                                                                                                                                         | 2017 Psychology International Journal of                                               | 14 | 4  | 415-441   |                                                                                                               | photo-elicitation             |
| Paton, Joy; Horsfall, Debbie; Carrington Amie                                                                                                              | Visual Sociology Reframed: An Analytical Synthesis and Discussion of Visual Methods in Social and Cultural Research                                                                                                                                                        | 2018 Qualitative Methods Sociological Methods &                                        | 17 | 1  |           | <a href="http://dx.doi.org/10.1177/1609406918761422">http://dx.doi.org/10.1177/1609406918761422</a>           | photo-elicitation             |
| Pauwels, Luc                                                                                                                                               | Untellable tales and uncertain futures: the unfolding narratives of young adults with cancer                                                                                                                                                                               | 2010 Research                                                                          | 38 | 4  | 545-581   | <a href="http://dx.doi.org/10.1177/0049124110366233">http://dx.doi.org/10.1177/0049124110366233</a>           | Review across categories      |
| Pearce, Susie; Gibson, Faith; Whelan, Jeremy; Kelly, Daniel                                                                                                | Employing participatory methods to engage an under-researched group: Opportunities and challenges                                                                                                                                                                          | International Journal of                                                               |    |    |           | <a href="http://dx.doi.org/10.1080/13645579.2020.1719614">http://dx.doi.org/10.1080/13645579.2020.1719614</a> | photo-elicitation             |
| Pettinger Clare; Letherby Gayle; Parsons, Julie M; Withers Lyndsey; Cunningham, Miranda; Whiteford, Andrew; Dâ€™Aprano Gia; Ayres, Richard; Sutton, Carole | More Than Talking                                                                                                                                                                                                                                                          | 2020 Social Research Methodology                                                       | 23 | 4  | 377-390   |                                                                                                               | photo-elicitation             |
| Phillipson Lyn; Hammond, Athena                                                                                                                            | Researching family practices in everyday life: methodological reflections from two studies                                                                                                                                                                                 | 2018 Methodological Innovations International Journal of                               | 11 | 1  |           | <a href="http://dx.doi.org/10.1177/2059799118769820">http://dx.doi.org/10.1177/2059799118769820</a>           | photo-elicitation             |
| Phoenix, Ann; Brannen, Julia                                                                                                                               | Issues of Collaboration, Representation, Meaning and Emotions: Utilising Participant-Led Visual Diaries to Capture the Everyday Lives of People in Mid to Later Life                                                                                                       | 2018 Qualitative Methods                                                               | 17 | 1  |           | <a href="http://dx.doi.org/10.1177/1609406918782784">http://dx.doi.org/10.1177/1609406918782784</a>           | photo-elicitation             |
| Pilcher, Katy; Martin, Wendy; Williams, Veronika                                                                                                           | Multimodality, multisensoriality and ethnographic knowing: social semiotics and the phenomenology of perception                                                                                                                                                            | International Journal of                                                               |    |    |           | <a href="http://dx.doi.org/10.1080/13645579.2014.854001">http://dx.doi.org/10.1080/13645579.2014.854001</a>   | photo-elicitation             |
| Pink, Sarah                                                                                                                                                | Entering an Ambiguous Space: Evoking Polyvocality in Educational Research through Collective Poetic Inquiry                                                                                                                                                                | International Journal of                                                               |    |    |           | <a href="http://dx.doi.org/10.1080/13645579.2015.1086199">http://dx.doi.org/10.1080/13645579.2015.1086199</a> | photo-elicitation             |
| Pithouse-Morgan, Kathleen; Naicker, Inbanathan; Chikoko, Vittal; Pillay, Daisy; Morojele, Pholoho; Hlao, Teboho                                            | Drawing: A visual method as an expressive data collection technique.                                                                                                                                                                                                       | 2016 Social Research Methodology                                                       | 19 | 6  | 677-692   |                                                                                                               | photo-elicitation             |
| Pitt, Edd                                                                                                                                                  | Interviewing offenders in a penitentiary environment and the use of mental maps during interviews.                                                                                                                                                                         | 2011 Qualitative Research                                                              | 11 | 3  | 261-276   | <a href="http://dx.doi.org/10.1177/1468794111399835">http://dx.doi.org/10.1177/1468794111399835</a>           | images                        |
| Polisenska, Veronika A                                                                                                                                     | Making Sense of Place: Mapping as a Multisensory Research Method                                                                                                                                                                                                           | 2014 Perspectives in Education Teaching visual methods in                              | 32 | 4  | 149-170   |                                                                                                               | poetry                        |
| Powell, Kimberly                                                                                                                                           | Studying place practices and consumption through volunteer-employed photography                                                                                                                                                                                            | 2017 the social sciences. Offenders on offending: Learning about crime from criminals. |    |    | 84-100    |                                                                                                               | drawing                       |
| Priested Nielsen, Helene; MÃ,ller, Karina                                                                                                                  |                                                                                                                                                                                                                                                                            | 2010 Qualitative Inquiry                                                               | 16 | 7  | 539-555   | <a href="http://dx.doi.org/10.1177/1077800410372600">http://dx.doi.org/10.1177/1077800410372600</a>           | mapping                       |
| Torp                                                                                                                                                       |                                                                                                                                                                                                                                                                            | 2016 Journal of Consumer Culture                                                       | 16 | 3  | 781-800   | <a href="http://dx.doi.org/10.1177/1469540514536195">http://dx.doi.org/10.1177/1469540514536195</a>           | mapping                       |
|                                                                                                                                                            |                                                                                                                                                                                                                                                                            |                                                                                        |    |    |           |                                                                                                               | photo-elicitation             |

|                                                                                                                                              |                                                                                                                                                                             |                                                                                        |      |    |             |                                                                                                                       |                          |
|----------------------------------------------------------------------------------------------------------------------------------------------|-----------------------------------------------------------------------------------------------------------------------------------------------------------------------------|----------------------------------------------------------------------------------------|------|----|-------------|-----------------------------------------------------------------------------------------------------------------------|--------------------------|
| Provenzo, Eugene F.; Ameen, Edward; Bengochea, Alain; Doorn, Kristen; Pontier, Ryan; Sembiant, Sabrina                                       | Photography and Oral History as a Means of Chronicling the Homeless in Miami: The "StreetWays" Project                                                                      | Educational Studies: Journal of the American Educational Studies Association           | 2011 | 47 | 5 419-435   |                                                                                                                       | photo-elicitation        |
| Quiñones, Gloria; Ridgway, Avis; Li, Liang                                                                                                   | Collaborative Drawing: A Creative Tool for Examination of Infant-Toddler Pedagogical Practices                                                                              | Australasian Journal of Early Childhood                                                | 2019 | 44 | 3 230-243   | <a href="https://doi.org/10.1177/1836939119855219">https://doi.org/10.1177/1836939119855219</a>                       | drawing                  |
| Raby, Rebecca; Lehmann, Wolfgang; Helleiner, Jane; Easterbrook Riley                                                                         | Reflections on Using Participant-Generated, Digital Photo-Elicitation in Research With Young Canadians About Their First Part-Time Jobs                                     | International Journal of Qualitative Methods                                           | 2018 | 17 | 1           | <a href="http://dx.doi.org/10.1177/1609406918790681">http://dx.doi.org/10.1177/1609406918790681</a>                   | photo-elicitation        |
| Rainford, Jon                                                                                                                                | Confidence and the effectiveness of creative methods in qualitative interviews with adults                                                                                  | International Journal of Social Research Methodology                                   | 2020 | 23 | 1 109-122   | <a href="http://dx.doi.org/10.1080/13645579.2019.1672287">http://dx.doi.org/10.1080/13645579.2019.1672287</a>         | drawing                  |
| Ramvi, Ellen; Manley, Julian; Froggett, Lynn; Liveng, Anne; Lading, Aase; Hollway, Wendy; Gripsrud, Birgitta Haga                            | The visual matrix method in a study of death and dying: Methodological reflections.                                                                                         | Psychoanalysis, Culture & Society                                                      | 2019 | 24 | 1 31-52     | <a href="http://dx.doi.org/10.1057/s41282-018-0095-y">http://dx.doi.org/10.1057/s41282-018-0095-y</a>                 | images                   |
| Ravn, Signe; Duff, Cameron                                                                                                                   | Putting the party down on paper: A novel method for mapping youth drug use in private settings.                                                                             | Health & Place                                                                         | 2015 | 31 | 124-132     | <a href="http://dx.doi.org/10.1016/j.healthplace.2014.11.010">http://dx.doi.org/10.1016/j.healthplace.2014.11.010</a> | mapping                  |
| Reid, David A; Simmt, Elaine; Savard, Annie; Suurtamm, Christine; Manuel, Dominic; Lin, Terry Wan Jung; Quigley, Brenna; Knipping, Christine | Observing Observers: Using Video to Prompt and Record Reflections on Teachers' Pedagogies in Four Regions of Canada                                                         | Research in Comparative and International Education                                    | 2015 | 10 | 3 367-382   | <a href="https://doi.org/10.1177/1745499915580425">https://doi.org/10.1177/1745499915580425</a>                       | video-elicitation        |
| Richardson, Tobin; Latz, Amanda O.; Coren, Ashleigh; Pickens, Chanelle                                                                       | Mapping Success: Understanding the Early Educational Experiences of Medical Students through the Creation of Chronological Educational Maps                                 | Journal of Ethnographic & Qualitative Research                                         | 2016 | 11 | 2 136-153   |                                                                                                                       | mapping                  |
| Rizvi, Sana                                                                                                                                  | Using Fiction to Reveal Truth: Challenges of Using Vignettes to Understand Participant Experiences Within Qualitative Research                                              | Forum : Qualitative Social Research                                                    | 2019 | 20 | 1           |                                                                                                                       | vignette                 |
| Rodriguez, Sheri K; Kerrigan, Monica Reid                                                                                                    | Using Graphic Elicitation to Explore Community College Transfer Student Identity, Development, and Engagement                                                               | The Qualitative Report                                                                 | 2016 | 21 | 6 1052-1070 |                                                                                                                       | mapping                  |
| Roos, Vera                                                                                                                                   | Implementing the Mmogo-method: A group of Setswana-speaking older people's relational experiences in a rural community setting.                                             | Understanding relational and group experiences through the Mmogo-method.               | 2016 |    | 55-88       | <a href="http://dx.doi.org/10.1007/978-3-319-31224-8_5">http://dx.doi.org/10.1007/978-3-319-31224-8_5</a>             | crafting; object-making  |
| Rosenblum, Jason; Hughes, Joan E.                                                                                                            | Digital Recording Technologies in Phenomenological Investigations                                                                                                           | Journal of Ethnographic & Qualitative Research                                         | 2017 | 12 | 1 29-49     |                                                                                                                       | video-elicitation        |
| Roth, Wendy D                                                                                                                                | Studying ethnic schemas: Integrating cognitive schemas into ethnicity research through photo elicitation.                                                                   | Studying ethnic identity: Methodological and conceptual approaches across disciplines. | 2015 |    | 89-118      | <a href="http://dx.doi.org/10.1037/14618-005">http://dx.doi.org/10.1037/14618-005</a>                                 | photo-elicitation        |
| Roth, Wendy D.                                                                                                                               | Studying ethnic schemas: integrating cognitive schemas into ethnicity research through photo elicitation                                                                    |                                                                                        | 2015 |    |             |                                                                                                                       | photo-elicitation        |
| Rowley, Jennifer; Jones, Rosalind; Vassiliou, Magda; Hanna, Sonya                                                                            | Using card-based games to enhance the value of semi-structured interviews. Decentering Power in Research with Criminalized Women: A Case for Photo-Elicitation Interviewing | International Journal of Market Research                                               | 2012 | 54 | 1 93-110    | <a href="http://dx.doi.org/10.2501/IJMR-54-1-093-110">http://dx.doi.org/10.2501/IJMR-54-1-093-110</a>                 | card task                |
| Rumpf, CesraÅ©a SÄderstrÄm, Johanna                                                                                                        | Life diagrams: a methodological and analytical tool for accessing life histories                                                                                            | Sociological Focus                                                                     | 2017 | 50 | 1 18-35     | <a href="http://dx.doi.org/10.1080/00380237.2016.1218214">http://dx.doi.org/10.1080/00380237.2016.1218214</a>         | photo-elicitation        |
| Sadler, Kirsten; Selkrig, Mark; Manathinga, Catherine                                                                                        | Teaching Is ... Opening up Spaces to Explore Academic Work in Fluid and Volatile Times                                                                                      | Qualitative Research Higher Education Research and Development                         | 2020 | 20 | 1           | <a href="http://dx.doi.org/10.1177/1468794118819068">http://dx.doi.org/10.1177/1468794118819068</a>                   | life grid                |
| Schiffer, Eva; Hauck, Jennifer                                                                                                               | Net-Map: Collecting social network data and facilitating network learning through participatory influence network mapping.                                                  | Higher Education Research and Development                                              | 2017 | 36 | 1 171-186   | <a href="http://dx.doi.org/10.1080/07294360.2016.1171299">http://dx.doi.org/10.1080/07294360.2016.1171299</a>         | postcards                |
| Schulze, SalomÄ© Shaw, Donna                                                                                                                 | The Value of Two Modes of Graphic Elicitation Interviews to Explore Factors That Impact on Student Learning in Higher Education                                             | Field Methods                                                                          | 2010 | 22 | 3 231-249   | <a href="http://dx.doi.org/10.1177/1525822X10374798">http://dx.doi.org/10.1177/1525822X10374798</a>                   | mapping                  |
| Shaw, Donna                                                                                                                                  | A New Look at an Old Research Method: Photo-Elicitation                                                                                                                     | Qualitative Sociology Review                                                           | 2017 | 13 | 2           |                                                                                                                       | mapping                  |
| Shell, Lynn                                                                                                                                  | Photo-Elicitation with Autodriving in Research with Individuals with Mild to Moderate Alzheimer's Disease: Advantages and Challenges                                        | TESOL Journal                                                                          | 2013 | 4  | 4 785-799   | <a href="http://dx.doi.org/10.1002/tesj.108">http://dx.doi.org/10.1002/tesj.108</a>                                   | photo-elicitation        |
| Sheridan, Joanna; Chamberlain, Kerry                                                                                                         | The power of things.                                                                                                                                                        | International Journal of Qualitative Methods                                           | 2014 | 13 | 1 170-184   | <a href="http://dx.doi.org/10.1177/160940691401300106">http://dx.doi.org/10.1177/160940691401300106</a>               | photo-elicitation        |
| Dupuis, Ann                                                                                                                                  | Timelining: visualizing experience                                                                                                                                          | Qualitative Research in Psychology                                                     | 2011 | 8  | 4 315-332   | <a href="http://dx.doi.org/10.1080/14780880903490821">http://dx.doi.org/10.1080/14780880903490821</a>                 | photo-elicitation; diary |
| Shirani, Fiona; Parkhill, Karen; Butler, Catherine; Groves, Chris; Pidgeon, Nick; Henwood, Karen                                             | Asking about the Future: Methodological Insights from Energy Biographies                                                                                                    | International Journal of Social Research Methodology                                   | 2016 | 19 | 4 429-444   | <a href="http://dx.doi.org/10.1080/13645579.2015.1029208">http://dx.doi.org/10.1080/13645579.2015.1029208</a>         | photo-elicitation        |
| Sidorenko Ewa                                                                                                                                | ÄA Portrait of Lower SilesiaÄ™: Researching identity through collodion photography and memory narratives                                                                  | Methodological Innovations                                                             | 2019 | 12 | 3           | <a href="http://dx.doi.org/10.1177/2059799119890787">http://dx.doi.org/10.1177/2059799119890787</a>                   | photo-elicitation        |

|                                                                                            |                                                                                                                                                        |      |                                                                                                                    |         |                                                                                                         |                                                                                                                   |                              |
|--------------------------------------------------------------------------------------------|--------------------------------------------------------------------------------------------------------------------------------------------------------|------|--------------------------------------------------------------------------------------------------------------------|---------|---------------------------------------------------------------------------------------------------------|-------------------------------------------------------------------------------------------------------------------|------------------------------|
| Sievers, Burkard                                                                           | Thinking organisations through photographs: The social photo-matrix as a method for understanding organisations in depth.                              | 2013 | Socioanalytic methods: Discovering the hidden in organisations and social systems.                                 | 129-151 |                                                                                                         |                                                                                                                   | photo-elicitation            |
| Sievers, Burkard                                                                           | It is difficult to think in the slammer: A social photo-matrix in a penal institution.                                                                 | 2014 | The psychosocial and organization studies: Affect at work.                                                         | 129-157 | <a href="http://dx.doi.org/10.1057/9781137347855_0012">http://dx.doi.org/10.1057/9781137347855_0012</a> |                                                                                                                   | photo-elicitation            |
| Slee, Phillip; Skrzypiec, Grace; Sandhu, Damanjit; Kaur, Kirandeep; Campbell, Marilyn      | PhotoStory: A legitimate research tool in cross-cultural research. A Case Study of a Case Study: Analysis of a Robust Qualitative Research Methodology | 2018 | Bullying, cyberbullying and student well-being in schools: Comparing European, Australian and Indian perspectives. | 189-207 | <a href="http://dx.doi.org/10.1017/9781316987384.012">http://dx.doi.org/10.1017/9781316987384.012</a>   |                                                                                                                   | photo-elicitation            |
| Snyder, Catherine                                                                          | Engaging Young Fathers in Research through Photo-Interviewing                                                                                          | 2012 | Qualitative Report                                                                                                 | 17      |                                                                                                         |                                                                                                                   | photo-elicitation            |
| Sopcak, Nicolette; Mayan, Maria; Skrypnek, Berna J                                         | Engaging Young Fathers in Research through Photo-Interviewing                                                                                          | 2015 | The Qualitative Report                                                                                             | 20      | 11                                                                                                      | 1871-1880                                                                                                         | photo-elicitation            |
| Spokes, Matthew; Denham, Jack Spowart, Lucy; Nairn, Karen                                  | Developing Interactive Elicitation: Social Desirability Bias and Capturing Play (Re)performing emotions in diary-interviews                            | 2019 | The Qualitative Report                                                                                             | 24      | 4                                                                                                       | 781-794                                                                                                           | photo-elicitation; vignette  |
| Stevenson, Blair                                                                           | Third spaces and video-stimulated recall: An exploration of teachers' cultural role in an Indigenous education context                                 | 2014 | Qualitative Research                                                                                               | 14      | 3                                                                                                       | 327-340                                                                                                           | diary                        |
| Stieber, Roger Kerstin; Blomgren, Constance                                                | Elicitation as a Mind-Set: Why Visual Data Matter?                                                                                                     | 2015 | Educational Action Research International Journal of Qualitative Methods                                           | 23      | 2                                                                                                       | 290-305                                                                                                           | stimulated recall            |
| Stravakou, Pelagia A; Lozga, Evangelia Ch                                                  | Vignettes in Qualitative Educational Research: Investigating Greek School Principals' Values                                                           | 2019 | Qualitative Methods                                                                                                | 18      |                                                                                                         | <a href="http://dx.doi.org/10.1080/09650792.2014.990986">http://dx.doi.org/10.1080/09650792.2014.990986</a>       | life grid; photo-elicitation |
| Sum, Raymond Kim Wai; Shi, Teng-Yao                                                        | Lived Experiences of a Hong Kong Physical Education Teacher: Ethnographical and Phenomenological Approaches                                            | 2018 | The Qualitative Report                                                                                             | 23      | 5                                                                                                       | 1188-1207                                                                                                         | vignette                     |
| Sutton, Barbara                                                                            | Playful cards, serious talk: A qualitative research technique to elicit women's embodied experiences.                                                  | 2016 | The Qualitative Report                                                                                             | 21      | 1                                                                                                       | 127-142                                                                                                           | photo-elicitation            |
| Switzer, S; Guta, A; de Prinse, K; Carusone, S Chan; Strike, C                             | Visualizing harm reduction: Methodological and ethical considerations                                                                                  | 2011 | Qualitative Research                                                                                               | 11      | 2                                                                                                       | 177-196                                                                                                           | card task                    |
| Switzer, Sarah                                                                             | Working With Photo Installation and Metaphor: Re-Visioning Photovoice Research                                                                         | 2015 | Social Science & Medicine International Journal of Qualitative Methods                                             | 133     | 77                                                                                                      | <a href="http://dx.doi.org/10.1016/j.socscimed.2015.03.040">http://dx.doi.org/10.1016/j.socscimed.2015.03.040</a> | photo-elicitation            |
| Tarr, Jen; Cornish, Flora; Gonzalez-Polledo, Elena                                         | Beyond the binaries: Reshaping pain communication through arts workshops.                                                                              | 2019 | Qualitative Methods                                                                                                | 18      |                                                                                                         | <a href="http://dx.doi.org/10.1177/1609406919872395">http://dx.doi.org/10.1177/1609406919872395</a>               | photo-elicitation            |
| Tarr, Jen; Thomas, Helen                                                                   | Mapping embodiment: methodologies for representing pain and injury                                                                                     | 2018 | Sociology of Health & Illness                                                                                      | 40      | 3                                                                                                       | 577-592                                                                                                           | drawing; photo-elicitation   |
| Teti, Michelle; Murray, Cynthia; Johnson, LaShauna; Binson, Diane                          | Photovoice as a community-based participatory research method among women living with HIV/AIDS: Ethical opportunities and challenges.                  | 2011 | Qualitative Research Journal of Empirical Research on Human Research Ethics                                        | 11      | 2                                                                                                       | 141-157                                                                                                           | body mapping                 |
| Thompson, MaryEllen; Oelker Abigail                                                        | Use of Participant-Generated Photographs versus Time Use Diaries as a Method of Qualitative Data Collection                                            | 2012 | Research Ethics International Journal of Qualitative Methods                                                       | 7       | 4                                                                                                       | 34-43                                                                                                             | photo-elicitation            |
| Thygesen, Marianne K; Pedersen, Birthe D; Kragstrup, Jakob; Wagner, Lis; Mogensen, Ole     | Utilizing a New Graphical Elicitation Technique to Collect Emotional Narratives Describing Disease Trajectories                                        | 2013 | Qualitative Methods                                                                                                | 12      | 1                                                                                                       | 624-637                                                                                                           | diary; photo-elicitation     |
| Tishelman, Carol; Lindqvist, Olav; Hajdarevic, Senada; Rasmussen, Birgit H; Goliath, Ida   | Beyond the visual and verbal: Using participant-produced photographs in research on the surroundings for care at the end-of-life                       | 2011 | The Qualitative Report                                                                                             | 16      | 2                                                                                                       | 596-608                                                                                                           | timeline                     |
| Torre, Daniela; Murphy, Joseph                                                             | A Different Lens: Using Photo-Elicitation Interviews in Education Research                                                                             | 2016 | Social Science & Medicine Education Policy Analysis                                                                | 168     | 120                                                                                                     | <a href="http://dx.doi.org/10.1016/j.socscimed.2016.09.012">http://dx.doi.org/10.1016/j.socscimed.2016.09.012</a> | photo-elicitation            |
| Tour, Ekaterina                                                                            | Understanding Digital Literacy Practices: What Can Be Learnt with Visual Methods?                                                                      | 2015 | Archives                                                                                                           | 23      | 111                                                                                                     |                                                                                                                   | photo-elicitation            |
| Turk, Melanie T; Fapohunda, Abimbola; Zoucha, Rick                                         | Using Photovoice to explore Nigerian immigrants' eating and physical activity in the United States.                                                    | 2017 | Changing English: Studies in Culture and Education Journal of Nursing                                              | 24      | 4                                                                                                       | 413-425                                                                                                           | photo-elicitation            |
| Umoquit, Muriah; Tso, Peggy; Varga-Atkins, T&#x2014;nde; O'Brien, Mark; Wheeldon, Johannes | Diagrammatic Elicitation: Defining the Use of Diagrams in Data Collection                                                                              | 2015 | Scholarship                                                                                                        | 47      | 1                                                                                                       | 16-24                                                                                                             | photo-elicitation            |
| van Schalkwyk, Gertina J.                                                                  | Collage Life Story Elicitation Technique: A Representational Technique for Scaffolding Autobiographical Memories                                       | 2013 | The Qualitative Report                                                                                             | 18      | 30                                                                                                      |                                                                                                                   | drawing                      |
| Vesterinen, Olli; Toom, Auli; Patrikainen, Sanna                                           | The Stimulated Recall Method and ICTs in Research on the Reasoning of Teachers                                                                         | 2010 | Qualitative Report International Journal of Research & Method in Education                                         | 15      | 3                                                                                                       | 675-695                                                                                                           | collage; life grid           |
|                                                                                            |                                                                                                                                                        | 2010 | Education                                                                                                          | 33      | 2                                                                                                       | 183-197                                                                                                           | stimulated recall            |

|                                                                                                                                                                |                                                                                                                                |                                                                 |      |    |             |                                                                                                               |                                             |
|----------------------------------------------------------------------------------------------------------------------------------------------------------------|--------------------------------------------------------------------------------------------------------------------------------|-----------------------------------------------------------------|------|----|-------------|---------------------------------------------------------------------------------------------------------------|---------------------------------------------|
| Vigurs, Katy; Kara, Helen                                                                                                                                      | Participants' Productive Disruption of a Community Photo-Elicitation Project: Improvised Methodologies in Practice             | International Journal of Social Research Methodology            | 2017 | 20 | 5 513-523   | <a href="http://dx.doi.org/10.1080/13645579.2016.1221259">http://dx.doi.org/10.1080/13645579.2016.1221259</a> | photo-elicitation                           |
| VilÀ , Montserrat; Pallisera, Maria; Fullana, Judit                                                                                                            | Exploring the Present and Projecting the Future: People with Severe Mental Illness Speaking for Themselves                     | International Journal of Qualitative Studies in Education (QSE) | 2016 | 29 | 9 1118-1130 | <a href="http://dx.doi.org/10.1080/09518398.2016.1201164">http://dx.doi.org/10.1080/09518398.2016.1201164</a> | photo-elicitation                           |
| Wallace, Heather Julie; McDonald, Susan; Belton, Suzanne; Miranda, Agueda Isolina; da Costa, Eurico; da Conceicao Matos, Livio; Henderson, Helen; Taft, Angela | Body mapping to explore reproductive ethno-physiological beliefs and knowledge of contraception in Timor-Leste.                | Qualitative Health Research                                     | 2018 | 28 | 7 1171-1184 | <a href="http://dx.doi.org/10.1177/1049732317750382">http://dx.doi.org/10.1177/1049732317750382</a>           | body mapping                                |
| Warner, Elyse; Johnson, Louise; Andrews, Fiona                                                                                                                 | Exploring the Suburban Ideal                                                                                                   | International Journal of Qualitative Methods                    | 2016 | 15 | 1           | <a href="http://dx.doi.org/10.1177/1609406916654716">http://dx.doi.org/10.1177/1609406916654716</a>           | photo-elicitation                           |
| Wass, Rob; Anderson, Vivienne; Rabello, Rafaela; Golding, Clinton; Rangì, Ana; Eteuati, Esmay                                                                  | Photovoice as a Research Method for Higher Education Research                                                                  | Higher Education Research and Development                       | 2020 | 39 | 4 834-850   | <a href="https://doi.org/10.1080/07294360.2019.1692791">https://doi.org/10.1080/07294360.2019.1692791</a>     | photo-elicitation; photovoice               |
| Wheeldon, J                                                                                                                                                    | Mapping mixed methods research: Methods, measures, and meaning.                                                                | Journal of Mixed Methods Research                               | 2010 | 4  | 2 87-102    | <a href="http://dx.doi.org/10.1177/1558689809358755">http://dx.doi.org/10.1177/1558689809358755</a>           | concept mapping; mind mapping               |
| Wheeldon, Johannes                                                                                                                                             | Is a Picture Worth a Thousand Words? Using Mind Maps to Facilitate Participant Recall in Qualitative Research                  | Qualitative Report                                              | 2011 | 16 | 2 509-522   |                                                                                                               | concept mapping; mind mapping               |
| White, Darcy; Stephenson, Rob                                                                                                                                  | Using community mapping to understand family planning behavior.                                                                | Field Methods                                                   | 2014 | 26 | 4 406-420   | <a href="http://dx.doi.org/10.1177/1525822X14529256">http://dx.doi.org/10.1177/1525822X14529256</a>           | mapping                                     |
| Whitworth, Andrew; Torras I Calvo, Maria Carme; Moss, Bodil; Amlesom Kifle, Nazareth; BlÅsternes, Terje                                                       | Changing Libraries: Facilitating Self-Reflection and Action Research on Organizational Change in Academic Libraries            | New Review of Academic Librarianship                            | 2014 | 20 | 2 251-274   | <a href="http://dx.doi.org/10.1080/13614533.2014.912989">http://dx.doi.org/10.1080/13614533.2014.912989</a>   | mapping                                     |
| Wilhoit, Elizabeth D                                                                                                                                           | Photo and video methods in organizational and managerial communication research.                                               | Management Communication Quarterly                              | 2017 | 31 | 3 447-466   | <a href="http://dx.doi.org/10.1177/0893318917704511">http://dx.doi.org/10.1177/0893318917704511</a>           | photo-elicitation                           |
| Wilhoit, Elizabeth D; Kisselburgh, Lorraine G                                                                                                                  | Through the eyes of the participant: Making connections between researcher and subject with participant viewpoint ethnography. | Field Methods                                                   | 2016 | 28 | 2 208-226   | <a href="http://dx.doi.org/10.1177/1525822X15601950">http://dx.doi.org/10.1177/1525822X15601950</a>           | video-elicitation                           |
| Williams Carawan, Lena; Nalavany, Blace                                                                                                                        | Using Photography and Art in Concept Mapping Research with Adults with Dyslexia                                                | Disability & Society                                            | 2010 | 25 | 3 317-329   |                                                                                                               | concept mapping; photo-elicitation; collage |
| Williams, Roman R; Whitehouse, Kyle                                                                                                                            | Photo Elicitation and the Visual Sociology of Religion                                                                         | Review of Religious Research                                    | 2015 | 57 | 2 303-318   | <a href="http://dx.doi.org/10.1007/s13644-014-0199-5">http://dx.doi.org/10.1007/s13644-014-0199-5</a>         | photo-elicitation                           |
| Williams, Sion; Keady, John                                                                                                                                    | Centre Stage Diagramming: Late-stage Parkinson's disease and Alzheimer's disease                                               | Journal of Aging Studies                                        | 2012 | 26 | 2 204-213   | <a href="http://dx.doi.org/10.1016/j.jaging.2011.12.005">http://dx.doi.org/10.1016/j.jaging.2011.12.005</a>   | diagram                                     |
| Willig, Carla                                                                                                                                                  | Reflections on the use of object elicitation.                                                                                  | Qualitative Psychology                                          | 2017 | 4  | 3 211-222   | <a href="http://dx.doi.org/10.1037/qap0000054">http://dx.doi.org/10.1037/qap0000054</a>                       | object-elicitation                          |
| Wills, Wendy J; Dickinson, Angela M; Meah, Angela; Short, Frances                                                                                              | Reflections on the use of visual methods in a qualitative study of domestic kitchen practices.                                 | Sociology                                                       | 2016 | 50 | 3 470-485   | <a href="http://dx.doi.org/10.1177/0038038515587651">http://dx.doi.org/10.1177/0038038515587651</a>           | photo-elicitation; diary; collage           |
| Zundel, Mike; MacIntosh, Robert; Mackay, David                                                                                                                 | The utility of video diaries for organizational research                                                                       | Organizational Research Methods                                 | 2018 | 21 | 2 386-411   | <a href="http://dx.doi.org/10.1177/1094428116665463">http://dx.doi.org/10.1177/1094428116665463</a>           | diary                                       |
