# Supplementary material for: More Than Words: An Integrative Review of Innovative Elicitation Techniques for Qualitative Interviews
Source: bioRxiv or medRxiv preprint supplement (doi:10.1101/2024.05.29.24308062), 2024-05-29
Supplement: Supplementary file [file media-4.pdf]

# More Than Words: An Integrative Review of Innovative Elicitation Techniques for Qualitative Interviews

## Appendix D

### How-to Guide Citations for Elicitation Techniques

| Technique                   | How-to Guide                                                                                                                                                                                                                                                                                                                                                                                                                                                                                                                                                                                                                                                                                                                                                                                                                                                                                                                                                                                                                                                                                                                                                                                                                                |
|-----------------------------|---------------------------------------------------------------------------------------------------------------------------------------------------------------------------------------------------------------------------------------------------------------------------------------------------------------------------------------------------------------------------------------------------------------------------------------------------------------------------------------------------------------------------------------------------------------------------------------------------------------------------------------------------------------------------------------------------------------------------------------------------------------------------------------------------------------------------------------------------------------------------------------------------------------------------------------------------------------------------------------------------------------------------------------------------------------------------------------------------------------------------------------------------------------------------------------------------------------------------------------------|
| Concept mapping             | Umoquit MJ, Tso P, Tünde VA, O’Brien M, Wheeldon J. Diagrammatic elicitation: Defining the use of diagrams in data collection. <i>The Qualitative Report</i> . 2013;18(60):1-12.                                                                                                                                                                                                                                                                                                                                                                                                                                                                                                                                                                                                                                                                                                                                                                                                                                                                                                                                                                                                                                                            |
| Crafting                    | N/A                                                                                                                                                                                                                                                                                                                                                                                                                                                                                                                                                                                                                                                                                                                                                                                                                                                                                                                                                                                                                                                                                                                                                                                                                                         |
| Drawing                     | <p>Cristancho S, Bidinosti S, Lingard L, Novick R, Ott M, Forbes T. Seeing in different ways: Introducing “rich pictures” in the study of expert judgment. <i>Qualitative Health Research</i>. 2015;25(5):713-725.<br/>doi:<a href="https://doi.org/10.1177/1049732314553594">10.1177/1049732314553594</a></p> <p>Cristancho S, Helmich E. Rich pictures: a companion method for qualitative research in medical education. <i>Medical Education</i>. 2019;53(9):916-924.<br/>doi:<a href="https://doi.org/10.1111/medu.13890">10.1111/medu.13890</a></p>                                                                                                                                                                                                                                                                                                                                                                                                                                                                                                                                                                                                                                                                                   |
| Music-elicitation           | N/A                                                                                                                                                                                                                                                                                                                                                                                                                                                                                                                                                                                                                                                                                                                                                                                                                                                                                                                                                                                                                                                                                                                                                                                                                                         |
| Object-elicitation          | Willig, C. Reflections on the use of object elicitation. <i>Qualitative Psychology</i> . 2017;4(3), 211–22. a different Willig one, but maybe more description/reflection on object elicitation itself.                                                                                                                                                                                                                                                                                                                                                                                                                                                                                                                                                                                                                                                                                                                                                                                                                                                                                                                                                                                                                                     |
| Photo and video-elicitation | <p>Barry, W., &amp; Beighton, C., (2021). Using photovoice in participatory educational research. In Sage Research Methods Cases Part 1. SAGE Publications, Ltd., <a href="https://doi.org/10.4135/9781529758337">https://doi.org/10.4135/9781529758337</a></p> <p>Boucher Jr ML, editor. Participant empowerment through photo-elicitation in ethnographic education research: New perspectives and approaches. Springer; 2017 Oct 13.</p> <p>Camille A. Sutton-Brown (2014) Photovoice: A Methodological Guide, <i>Photography and Culture</i>, 7:2, 169-185, DOI: 10.2752/175145214X13999922103165</p> <p>Cristancho S, LaDonna K, Field E. Visual methods in health professions research: purpose, challenges and opportunities. In: Cleland J, Durning SJ, eds. <i>Researching Medical Education</i>. 1st ed. Wiley; 2022:139-151.<br/>doi:<a href="https://doi.org/10.1002/9781119839446.ch13">10.1002/9781119839446.ch13</a></p> <p>Zhang, Y., &amp; Hennebry-Leung, M. (2023). A Review of Using Photo-Elicitation Interviews in Qualitative Education Research. <i>International Journal of Qualitative Methods</i>, 22.<br/><a href="https://doi.org/10.1177/16094069231185456">https://doi.org/10.1177/16094069231185456</a></p> |

|                         |                                                                                                                                                                                                                                                                                                                           |
|-------------------------|---------------------------------------------------------------------------------------------------------------------------------------------------------------------------------------------------------------------------------------------------------------------------------------------------------------------------|
| Reflective Writing      | Meth P. 'Coughing everything out': the solicited diary method. In: <i>Qualitative Data : A Practical Guide To Textual, Media and Virtual Techniques.</i> ; 2017:94-116s.                                                                                                                                                  |
| Sorting                 | N/A                                                                                                                                                                                                                                                                                                                       |
| Space and Place Mapping | McGrath L, Mullarkey S, Reavey P. Building visual worlds: Using maps in qualitative psychological research on affect and emotion. <i>Qualitative Research in Psychology.</i> 2020 Jan 2;17(1):75-97.                                                                                                                      |
| Storytelling            | Moreau KA, Eady K, Sikora L, Horsley T. Digital storytelling in health professions education: a systematic review. <i>BMC medical education.</i> 2018 Dec;18:1-9.                                                                                                                                                         |
| Temporal techniques     | Sheridan J, Chamberlain K, Dupuis A. Timelining: visualizing experience. <i>Qual Res.</i> 2011;11(5):552-569. doi:10.1177/1468794111413235<br>Mignone J, Chase RM, Roger K. A graphic and tactile data elicitation tool for qualitative research : the life story board. <i>Forum Qual Sozialforsch.</i> 2019;20(2):1-26. |
| Vignette                | Jenkins N, Bloor M, Fischer J, Berney L, Neale J. Putting it in context: the use of vignettes in qualitative interviewing. <i>Qualitative research.</i> 2010 Apr;10(2):175-98.                                                                                                                                            |
| Walking                 | N/A                                                                                                                                                                                                                                                                                                                       |
